# Supplementary material for: Tamil Nadu Pregnancy and Heart Disease Registry (TNPHDR): design and methodology
Source: Springer Nature journal article supplement (doi:10.1186/s12884-021-04305-3), 2022-01-29
Supplement: MOESM2 [file 20079286]

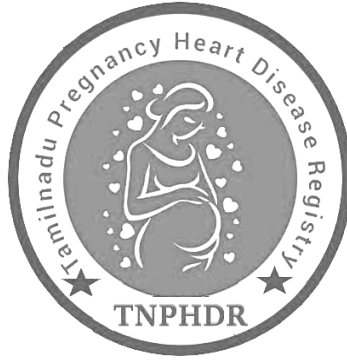

.....●.....

**TAMIL NADU PREGNANCY & HEART  
DISEASE REGISTRY  
DATA COLLECTION FORM**

.....●.....

Name of the institution :

Filled by :

Department :

Signature :

## சுய ஒப்புதல் படிவம்

# தமிழ்நாடு கார்ப்பம் மற்றும் இதய நோய் பதிவு

ஆராய்ச்சி நிலையம்: இருதய மருத்துவ நிறுவனம்,  
இராஜீவ் காந்தி அரசு பொது மருத்துவமனை மற்றும்  
சென்னை மருத்துவக்கல்லூரி,  
சென்னை - 600 003.

பங்கு பெறுபவர் இதனை (✓) குறிக்கவும்

மேலே குறிப்பிட்டுள்ள மருத்துவ ஆய்வின் விவரங்கள் எனக்கு விளக்கப்பட்டது.

என்னுடைய சந்தேகங்களைக் கேட்கவும், அதற்கான தகுந்த விளக்கங்களைப் பெறவும் வாய்ப்பளிக்கப்பட்டது.

நான் இவ்வாய்வில் தன்னிச்சையாகத்தான் பங்கேற்கிறேன்.

எந்தக் காரணத்தினாலோ எந்தக் கட்டத்திலும், எந்த சட்டசிக்கலுக்கும் உட்படாமல் நான் இவ்வாய்வில் இருந்து விலகிக் கொள்ளலாம் என்றும் அறிந்துகொண்டேன்.

இந்த ஆய்வு சம்மந்தமாகவும், மேலும் இது சார்ந்த ஆய்வு மேற்கொள்ளும் போதும்,

இந்த ஆய்வில் பங்கு பெறும் மருத்துவர் என்னுடைய மருத்துவ அறிக்கைகளைப் பார்ப்பதற்கு என் அனுமதி தேவையில்லை என அறிந்து கொள்கிறேன்.

நான் ஆய்வில் இருந்துவிலகிக் கொண்டாலும் இது பொருந்தும் என அறிகிறேன்.

இந்த ஆய்வின் மூலம் கிடைக்கும் தகவல்களையும், பரிசோதனை முடிவுகளையும் மற்றும் சிகிச்சை தொடர்பான தகவல்களையும் மருத்துவர் மேற்கொள்ளும் ஆய்வில் பயன்படுத்திக்கொள்ளவும், அதைப் பிரசுரிக்கவும் என் முழு மனதுடன் சம்மதிக்கிறேன்.

இந்த ஆய்வில் பங்கு கொள்ள ஒப்புக்கொள்கிறேன். எனக்குக் கொடுக்கப்பட்ட அறிவுரைகளின் படி நடந்து கொள்வதுடன், இந்த ஆய்வை மேற்கொள்ளும் மருத்துவ அணிக்கு உண்மையுடன் இருப்பேன் என்றும் உறுதியளிக்கிறேன்.

என் உடல் நலம் பாதிக்கப்பட்டாலோ அல்லது எதிர் பாராத வழக்கத்திற்கு மாறாக நோய்க்குறி தென்பட்டாலோ உடனே அதை மருத்துவ அணியிடம் தெரிவிப்பேன் என உறுதி அளிக்கிறேன்.

இந்த ஆய்வில் எனக்கு இரத்தப் பரிசோதனை மற்றும் இதர மருத்துவப் பரிசோதனைகள் செய்து கொள்ள நான் முழுமனதுடன் சம்மதிக்கிறேன்.

இந்த ஆய்வில் என் தகவல்களை மாநில மற்றும் தேசிய மருத்துவ நலனுக்காக பயன்படுத்திக் கொள்ள என் முழு மனதுடன் சம்மதிக்கிறேன்.

**பங்கு பெறுபவரின் எண்:**

பங்கேற்பவரின் கையொப்பம் ..... இடம் ..... தேதி .....

கட்டைவிரல் ரேகை:

பங்கேற்பவரின் பெயர் மற்றும் விலாசம் .....

ஆய்வாளரின் கையொப்பம் ..... இடம் ..... தேதி .....

ஆய்வாளரின் பெயர் .....

A1. TNP HDR No: \_\_\_\_\_ / \_\_\_\_\_ / \_\_\_\_\_ / \_\_\_\_\_

A2. RCH. No : \_\_\_\_\_

A3. DATE OF REGISTRATION: \_\_\_\_\_ / \_\_\_\_\_ / \_\_\_\_\_

| TAMIL NADU PREGNANCY AND HEART DISEASE REGISTRY-DATA COLLECTION FORM |     |    |                                                                                                                                                                             |
|----------------------------------------------------------------------|-----|----|-----------------------------------------------------------------------------------------------------------------------------------------------------------------------------|
| INCLUSION CRITERIA CHECKLIST*                                        |     |    |                                                                                                                                                                             |
| For all patients*<br>(Tick the applicable)                           | Yes | No | A4. <input type="radio"/> Antenatal<br><input type="radio"/> Post-partum (Up to 6 wks)<br><input type="radio"/> Postnatal (1-5 months, only for peri-partum cardiomyopathy) |
|                                                                      | Yes | No | A5. Heart disease                                                                                                                                                           |
|                                                                      | Yes | No | A6. Consented for the study                                                                                                                                                 |

\*For all registered patients, the above three rows should be Yes

| BASELINE DATA- IDENTIFIER PAGE |                                                                                                                                                            |  |                      |                                    |                      |                                          |                      |                                     |                      |                      |                      |                      |
|--------------------------------|------------------------------------------------------------------------------------------------------------------------------------------------------------|--|----------------------|------------------------------------|----------------------|------------------------------------------|----------------------|-------------------------------------|----------------------|----------------------|----------------------|----------------------|
| <b>B1</b>                      | Hospital/PIN number*:                                                                                                                                      |  |                      |                                    |                      |                                          |                      |                                     |                      |                      |                      |                      |
| <b>B2</b>                      | Full name of the patient (IN BLOCK LETTERS)*:                                                                                                              |  |                      |                                    |                      |                                          |                      |                                     |                      |                      |                      |                      |
| <b>B3</b>                      | Name of the Husband/Guardian*:                                                                                                                             |  |                      |                                    |                      |                                          |                      |                                     |                      |                      |                      |                      |
| <b>B4</b>                      | Age (in completed years):                                                                                                                                  |  | <input type="text"/> | <input type="text"/>               | <b>B5</b>            | Date of Birth*:                          |                      | <input type="text"/>                | <input type="text"/> | <input type="text"/> | <input type="text"/> | <input type="text"/> |
| <b>B6</b>                      | House/Flat name or number*:                                                                                                                                |  |                      |                                    |                      |                                          |                      |                                     |                      |                      |                      |                      |
| <b>B7</b>                      | Street/locality*:                                                                                                                                          |  |                      |                                    |                      |                                          |                      |                                     |                      |                      |                      |                      |
| <b>B8</b>                      | State*:                                                                                                                                                    |  |                      |                                    |                      |                                          |                      |                                     |                      |                      |                      |                      |
| <b>B9</b>                      | District*:                                                                                                                                                 |  |                      |                                    |                      |                                          |                      |                                     |                      |                      |                      |                      |
| <b>B10</b>                     | Taluk*:                                                                                                                                                    |  |                      |                                    |                      | <b>B11</b> Village*:                     |                      |                                     |                      |                      |                      |                      |
| <b>B12</b>                     | Post office*:                                                                                                                                              |  |                      |                                    |                      | <b>B13</b> Pin code*                     |                      |                                     |                      |                      |                      |                      |
| <b>B14</b>                     | Aadhaar no:                                                                                                                                                |  |                      |                                    |                      |                                          |                      |                                     |                      |                      |                      |                      |
| <b>B15</b>                     | Patient's mobile number*                                                                                                                                   |  |                      |                                    |                      | 0                                        | <input type="text"/> | <input type="text"/>                | <input type="text"/> | <input type="text"/> | <input type="text"/> | <input type="text"/> |
| <b>B16</b>                     | Patient's alternate mobile number                                                                                                                          |  |                      |                                    |                      | 0                                        | <input type="text"/> | <input type="text"/>                | <input type="text"/> | <input type="text"/> | <input type="text"/> | <input type="text"/> |
| <b>B17</b>                     | Relative's mobile number                                                                                                                                   |  |                      |                                    |                      | 0                                        | <input type="text"/> | <input type="text"/>                | <input type="text"/> | <input type="text"/> | <input type="text"/> | <input type="text"/> |
|                                | Name of the relative:                                                                                                                                      |  |                      |                                    |                      | Relationship:                            |                      |                                     |                      |                      |                      |                      |
| <b>B18</b>                     | Total number of years of education*<br>(Zero for Illiterates)                                                                                              |  |                      | <input type="text"/>               | <input type="text"/> | Qualification (Enter the highest degree) |                      |                                     |                      |                      |                      |                      |
|                                |                                                                                                                                                            |  |                      | <input type="radio"/> Uneducated   |                      | <input type="radio"/> Primary school     |                      | <input type="radio"/> Middle school |                      |                      |                      |                      |
|                                |                                                                                                                                                            |  |                      | <input type="radio"/> High school  |                      | <input type="radio"/> Higher Secondary   |                      | <input type="radio"/> Undergraduate |                      |                      |                      |                      |
|                                |                                                                                                                                                            |  |                      | <input type="radio"/> Postgraduate |                      | <input type="radio"/> Doctorate          |                      |                                     |                      |                      |                      |                      |
| <b>B19</b>                     | Occupation*:                                                                                                                                               |  |                      |                                    |                      |                                          |                      |                                     |                      |                      |                      |                      |
| <b>B20</b>                     | Marital status*: <input type="radio"/> Married <input type="radio"/> Never Married <input type="radio"/> Widowed <input type="radio"/> Divorced/ Separated |  |                      |                                    |                      |                                          |                      |                                     |                      |                      |                      |                      |
| <b>B21</b>                     | Total monthly income of the family:                                                                                                                        |  |                      |                                    |                      | <b>B22</b> Total members of the family : |                      |                                     |                      |                      |                      |                      |
| <b>B23</b>                     | Socio-economic status*: (As per ration card) <input type="radio"/> Above Poverty Line <input type="radio"/> Below Poverty Line                             |  |                      |                                    |                      |                                          |                      |                                     |                      |                      |                      |                      |

**REGISTRATION DETAILS-REGISTRATION PAGE**

**TIME OF FIRST DIAGNOSIS OF HEART DISEASE (tick applicable)**

|           |                                                                               |                                                                                                    |                                                                                                                                                                                |
|-----------|-------------------------------------------------------------------------------|----------------------------------------------------------------------------------------------------|--------------------------------------------------------------------------------------------------------------------------------------------------------------------------------|
| <b>C1</b> | Chronological age at diagnosis ( <i>in years</i> ) : _____                    |                                                                                                    |                                                                                                                                                                                |
|           | <input type="radio"/> Before marriage<br><input type="radio"/> After marriage | During present pregnancy <input type="radio"/><br>Prior to present pregnancy <input type="radio"/> | Gestational age at diagnosis (In weeks) : _____<br>If prior to present pregnancy, specify whether during previous pregnancy <input type="radio"/> Yes <input type="radio"/> No |

**PRE-PREGNANCY DETAILS (tick applicable)**

|           |                                                                                                                                                    |                          |                              |                                                                                                                                                                                                                            |                          |                          |
|-----------|----------------------------------------------------------------------------------------------------------------------------------------------------|--------------------------|------------------------------|----------------------------------------------------------------------------------------------------------------------------------------------------------------------------------------------------------------------------|--------------------------|--------------------------|
| <b>C2</b> | Pre-pregnancy cardiac and related history                                                                                                          |                          |                              |                                                                                                                                                                                                                            |                          |                          |
|           | <b>C2.1 NYHA CLASS</b> <input type="radio"/> Class I <input type="radio"/> Class II <input type="radio"/> Class III <input type="radio"/> Class IV |                          |                              |                                                                                                                                                                                                                            |                          |                          |
|           | <b>C2.2</b> Prior HF                                                                                                                               | <b>C2.3</b> Prior AF     | <b>C2.4</b> Prior procedures | <b>C2.5</b> Prior OAC use                                                                                                                                                                                                  | <b>C2.6</b> Others       |                          |
|           | <input type="checkbox"/>                                                                                                                           | <input type="checkbox"/> | <input type="checkbox"/>     | <input type="checkbox"/>                                                                                                                                                                                                   | <input type="checkbox"/> |                          |
|           | <b>C2.7</b> Details of prior procedures done (Surgical procedures or Cardiac interventions)                                                        |                          |                              |                                                                                                                                                                                                                            |                          |                          |
|           | Name of the procedure                                                                                                                              |                          |                              |                                                                                                                                                                                                                            |                          |                          |
|           | Chronological age during the procedure (in yrs)                                                                                                    |                          |                              |                                                                                                                                                                                                                            |                          |                          |
|           | Institution where intervention was done                                                                                                            |                          |                              |                                                                                                                                                                                                                            |                          |                          |
|           | <b>C2.8</b> Prior Hospitalisations (if any) <input type="radio"/> Yes <input type="radio"/> No                                                     |                          |                              | Number of days hospitalized: <input type="text" value="M"/> <input type="text" value="M"/>                                                                                                                                 |                          |                          |
|           | Reason for hospitalization: _____                                                                                                                  |                          |                              | Month & year of hospitalization: <input type="text" value="M"/> <input type="text" value="M"/> <input type="text" value="Y"/> <input type="text" value="Y"/> <input type="text" value="Y"/> <input type="text" value="Y"/> |                          |                          |
|           | <b>C2.9</b> Medications on: ( <i>specify if on any drugs with dosage</i> )                                                                         |                          |                              |                                                                                                                                                                                                                            |                          |                          |
|           | <b>C2.10</b> Diabetes                                                                                                                              | <b>C2.11</b> SHT         | <b>C2.12</b> CAD             | <b>C2.13</b> Alcohol                                                                                                                                                                                                       | <b>C2.14</b> Smoking     | <b>C2.15</b> Tobacco use |
|           | <input type="checkbox"/>                                                                                                                           | <input type="checkbox"/> | <input type="checkbox"/>     | <input type="checkbox"/>                                                                                                                                                                                                   | <input type="checkbox"/> | <input type="checkbox"/> |
|           | <b>C2.16</b> <input type="checkbox"/> Others, Specify                                                                                              |                          |                              |                                                                                                                                                                                                                            |                          |                          |

**PREVIOUS PREGNANCY DETAILS Yes  No (In case of more than one previous pregnancy kindly attach a copy of this page for each)**

|                                                   |                                                                                                                                                                                                                                                                                                                                                                                                                                                                                                                                                                                                               |                                                                                                                                                                                                                                                                                      |                                        |                                                 |                                            |                                     |                                                   |                                                                |                                          |  |
|---------------------------------------------------|---------------------------------------------------------------------------------------------------------------------------------------------------------------------------------------------------------------------------------------------------------------------------------------------------------------------------------------------------------------------------------------------------------------------------------------------------------------------------------------------------------------------------------------------------------------------------------------------------------------|--------------------------------------------------------------------------------------------------------------------------------------------------------------------------------------------------------------------------------------------------------------------------------------|----------------------------------------|-------------------------------------------------|--------------------------------------------|-------------------------------------|---------------------------------------------------|----------------------------------------------------------------|------------------------------------------|--|
| <b>C3</b>                                         | <b>C3.1</b> Date of delivery/termination of previous pregnancy                                                                                                                                                                                                                                                                                                                                                                                                                                                                                                                                                | <input type="text" value="D"/> <input type="text" value="D"/> <input type="text" value="M"/> <input type="text" value="M"/> <input type="text" value="Y"/> <input type="text" value="Y"/> <input type="text" value="Y"/> <input type="text" value="Y"/>                              |                                        |                                                 |                                            |                                     |                                                   |                                                                |                                          |  |
|                                                   | <b>C3.2</b> Gestational age at delivery (weeks)                                                                                                                                                                                                                                                                                                                                                                                                                                                                                                                                                               | <input type="text" value=""/> <input type="text" value=""/>                                                                                                                                                                                                                          |                                        |                                                 |                                            |                                     |                                                   |                                                                |                                          |  |
|                                                   | <b>C3.3</b> Mode of delivery                                                                                                                                                                                                                                                                                                                                                                                                                                                                                                                                                                                  | <input type="radio"/> Vaginal <input type="radio"/> Assisted vaginal <input type="radio"/> LSCS<br><input type="radio"/> Live birth <input type="radio"/> IUD <input type="radio"/> Still birth<br><input type="radio"/> Spontaneous Abortion <input type="radio"/> Induced Abortion |                                        |                                                 |                                            |                                     |                                                   |                                                                |                                          |  |
|                                                   | <b>C3.4</b> Foetal outcome                                                                                                                                                                                                                                                                                                                                                                                                                                                                                                                                                                                    | Birth Weight(In Kgs) <input type="text" value=""/>                                                                                                           |                                        |                                                 |                                            |                                     |                                                   |                                                                |                                          |  |
|                                                   | <b>C3.5</b> AN/PN decompensation <input type="radio"/> Yes <input type="radio"/> No<br>If yes details: <table style="width:100%; border:none;"> <tr> <td><input type="checkbox"/> Heart failure</td> <td><input type="checkbox"/> Bleeding complications</td> </tr> <tr> <td><input type="checkbox"/> Cardiogenic shock</td> <td><input type="checkbox"/> Arrhythmia</td> </tr> <tr> <td><input type="checkbox"/> Thrombotic complications</td> <td><input type="checkbox"/> Infective complications(endocarditis)</td> </tr> <tr> <td><input type="checkbox"/> Others(specify)</td> <td></td> </tr> </table> |                                                                                                                                                                                                                                                                                      | <input type="checkbox"/> Heart failure | <input type="checkbox"/> Bleeding complications | <input type="checkbox"/> Cardiogenic shock | <input type="checkbox"/> Arrhythmia | <input type="checkbox"/> Thrombotic complications | <input type="checkbox"/> Infective complications(endocarditis) | <input type="checkbox"/> Others(specify) |  |
| <input type="checkbox"/> Heart failure            | <input type="checkbox"/> Bleeding complications                                                                                                                                                                                                                                                                                                                                                                                                                                                                                                                                                               |                                                                                                                                                                                                                                                                                      |                                        |                                                 |                                            |                                     |                                                   |                                                                |                                          |  |
| <input type="checkbox"/> Cardiogenic shock        | <input type="checkbox"/> Arrhythmia                                                                                                                                                                                                                                                                                                                                                                                                                                                                                                                                                                           |                                                                                                                                                                                                                                                                                      |                                        |                                                 |                                            |                                     |                                                   |                                                                |                                          |  |
| <input type="checkbox"/> Thrombotic complications | <input type="checkbox"/> Infective complications(endocarditis)                                                                                                                                                                                                                                                                                                                                                                                                                                                                                                                                                |                                                                                                                                                                                                                                                                                      |                                        |                                                 |                                            |                                     |                                                   |                                                                |                                          |  |
| <input type="checkbox"/> Others(specify)          |                                                                                                                                                                                                                                                                                                                                                                                                                                                                                                                                                                                                               |                                                                                                                                                                                                                                                                                      |                                        |                                                 |                                            |                                     |                                                   |                                                                |                                          |  |
|                                                   | <b>C3.6</b> Any antenatal interventions done <input type="radio"/> Yes <input type="radio"/> No ( <i>If yes, Kindly specify</i> )                                                                                                                                                                                                                                                                                                                                                                                                                                                                             |                                                                                                                                                                                                                                                                                      |                                        |                                                 |                                            |                                     |                                                   |                                                                |                                          |  |
|                                                   | Name of the procedure                                                                                                                                                                                                                                                                                                                                                                                                                                                                                                                                                                                         |                                                                                                                                                                                                                                                                                      |                                        |                                                 |                                            |                                     |                                                   |                                                                |                                          |  |
|                                                   | Gravida when procedure done                                                                                                                                                                                                                                                                                                                                                                                                                                                                                                                                                                                   |                                                                                                                                                                                                                                                                                      |                                        |                                                 |                                            |                                     |                                                   |                                                                |                                          |  |
|                                                   | Gestational age during procedure                                                                                                                                                                                                                                                                                                                                                                                                                                                                                                                                                                              |                                                                                                                                                                                                                                                                                      |                                        |                                                 |                                            |                                     |                                                   |                                                                |                                          |  |
|                                                   | Institution where done                                                                                                                                                                                                                                                                                                                                                                                                                                                                                                                                                                                        |                                                                                                                                                                                                                                                                                      |                                        |                                                 |                                            |                                     |                                                   |                                                                |                                          |  |
|                                                   | <b>C3.7</b> Post-partum interventions (within 6weeks of delivery). <input type="radio"/> Yes <input type="radio"/> No ( <i>If yes, Kindly specify</i> )                                                                                                                                                                                                                                                                                                                                                                                                                                                       |                                                                                                                                                                                                                                                                                      |                                        |                                                 |                                            |                                     |                                                   |                                                                |                                          |  |
|                                                   | Name of the procedure                                                                                                                                                                                                                                                                                                                                                                                                                                                                                                                                                                                         |                                                                                                                                                                                                                                                                                      |                                        |                                                 |                                            |                                     |                                                   |                                                                |                                          |  |
|                                                   | Post-natal day procedure done                                                                                                                                                                                                                                                                                                                                                                                                                                                                                                                                                                                 |                                                                                                                                                                                                                                                                                      |                                        |                                                 |                                            |                                     |                                                   |                                                                |                                          |  |
|                                                   | Institution where done                                                                                                                                                                                                                                                                                                                                                                                                                                                                                                                                                                                        |                                                                                                                                                                                                                                                                                      |                                        |                                                 |                                            |                                     |                                                   |                                                                |                                          |  |
|                                                   | <b>C3.8</b> Was the previous pregnancy continued Against Medical Advice <input type="radio"/> Yes <input type="radio"/> No                                                                                                                                                                                                                                                                                                                                                                                                                                                                                    |                                                                                                                                                                                                                                                                                      |                                        |                                                 |                                            |                                     |                                                   |                                                                |                                          |  |

| PRESENT PREGNANCY DETAILS |                                                                                                                |                                                                                                                                                                                                                                                                                                                                                                                                                                                                                                                                                                                                                                                                                                                                                        |                           |                          |                                                   |                                                                                   |   |                              |   |
|---------------------------|----------------------------------------------------------------------------------------------------------------|--------------------------------------------------------------------------------------------------------------------------------------------------------------------------------------------------------------------------------------------------------------------------------------------------------------------------------------------------------------------------------------------------------------------------------------------------------------------------------------------------------------------------------------------------------------------------------------------------------------------------------------------------------------------------------------------------------------------------------------------------------|---------------------------|--------------------------|---------------------------------------------------|-----------------------------------------------------------------------------------|---|------------------------------|---|
| <b>ANTENATAL DETAILS</b>  |                                                                                                                |                                                                                                                                                                                                                                                                                                                                                                                                                                                                                                                                                                                                                                                                                                                                                        |                           |                          |                                                   |                                                                                   |   |                              |   |
| <b>C4</b>                 | Obstetric score                                                                                                | G                                                                                                                                                                                                                                                                                                                                                                                                                                                                                                                                                                                                                                                                                                                                                      | P                         | L                        | A                                                 | <input type="radio"/> Singleton pregnancy<br><input type="radio"/> Twin pregnancy |   | <input type="radio"/> Others |   |
| <b>C5</b>                 | LMP (Last Menstrual Period)                                                                                    | D                                                                                                                                                                                                                                                                                                                                                                                                                                                                                                                                                                                                                                                                                                                                                      | D                         | M                        | M                                                 | Y                                                                                 | Y | Y                            | Y |
| <b>C6</b>                 | EDD (Expected Date of Delivery)                                                                                | D                                                                                                                                                                                                                                                                                                                                                                                                                                                                                                                                                                                                                                                                                                                                                      | D                         | M                        | M                                                 | Y                                                                                 | Y | Y                            | Y |
| <b>C7</b>                 | Gestational age at registration (weeks)                                                                        |                                                                                                                                                                                                                                                                                                                                                                                                                                                                                                                                                                                                                                                                                                                                                        |                           |                          |                                                   |                                                                                   |   |                              |   |
| <b>C8</b>                 | Antenatal check-ups (tick applicable)                                                                          |                                                                                                                                                                                                                                                                                                                                                                                                                                                                                                                                                                                                                                                                                                                                                        |                           |                          |                                                   |                                                                                   |   |                              |   |
|                           | <b>C8.1</b> <input type="radio"/> Booked <input type="radio"/> Unbooked <input type="radio"/> Status not known |                                                                                                                                                                                                                                                                                                                                                                                                                                                                                                                                                                                                                                                                                                                                                        |                           |                          |                                                   |                                                                                   |   |                              |   |
|                           | <b>C8.2</b> Institution where AN check-up done:                                                                |                                                                                                                                                                                                                                                                                                                                                                                                                                                                                                                                                                                                                                                                                                                                                        |                           |                          |                                                   |                                                                                   |   |                              |   |
| <b>C9</b>                 | <b>ASSOCIATED RISK FACTORS</b> (tick all applicable)                                                           |                                                                                                                                                                                                                                                                                                                                                                                                                                                                                                                                                                                                                                                                                                                                                        |                           |                          |                                                   |                                                                                   |   |                              |   |
|                           | <b>C9.1</b> PIH                                                                                                | <b>C9.2</b> GDM                                                                                                                                                                                                                                                                                                                                                                                                                                                                                                                                                                                                                                                                                                                                        | <b>C9.3</b> Hypothyroid   | <b>C9.4</b> Hyperthyroid | <b>C9.5</b> Anaemia                               | <b>C9.6</b> Rheumatologic problems                                                |   |                              |   |
|                           | <input type="checkbox"/>                                                                                       | <input type="checkbox"/>                                                                                                                                                                                                                                                                                                                                                                                                                                                                                                                                                                                                                                                                                                                               | <input type="checkbox"/>  | <input type="checkbox"/> | <input type="checkbox"/>                          | <input type="checkbox"/>                                                          |   |                              |   |
|                           | <b>C9.7</b> <input type="checkbox"/> Others, specify _____                                                     |                                                                                                                                                                                                                                                                                                                                                                                                                                                                                                                                                                                                                                                                                                                                                        |                           |                          |                                                   |                                                                                   |   |                              |   |
| <b>C10</b>                | <b>COMPLETE DIAGNOSIS</b>                                                                                      | <hr/> <hr/> <div style="display: flex; flex-direction: column; gap: 5px;"> <input type="checkbox"/> Heart failure           <input type="checkbox"/> Pulmonary hypertension    <input type="radio"/> Primary    <input type="radio"/> Secondary           <input type="checkbox"/> Atrial fibrillation           <input type="checkbox"/> Rheumatic Heart disease           <input type="checkbox"/> Cardiomyopathy           <input type="checkbox"/> Aortopathy/ Diseases of Aorta           <input type="checkbox"/> Congenital Heart disease           <input type="checkbox"/> Arrhythmia           <input type="checkbox"/> Coronary artery disease           <input type="checkbox"/> Post-Interventional. If yes, Specify _____         </div> |                           |                          |                                                   |                                                                                   |   |                              |   |
| <b>C11</b>                | Present pregnancy continued Against Medical Advice                                                             |                                                                                                                                                                                                                                                                                                                                                                                                                                                                                                                                                                                                                                                                                                                                                        | <input type="radio"/> Yes |                          | <input type="radio"/> No                          |                                                                                   |   |                              |   |
| <b>C12</b>                | Any antenatal interventions done before registration                                                           |                                                                                                                                                                                                                                                                                                                                                                                                                                                                                                                                                                                                                                                                                                                                                        | <input type="radio"/> Yes |                          | <input type="radio"/> No (If yes, Kindly specify) |                                                                                   |   |                              |   |
|                           | Name of the procedure                                                                                          |                                                                                                                                                                                                                                                                                                                                                                                                                                                                                                                                                                                                                                                                                                                                                        |                           |                          |                                                   |                                                                                   |   |                              |   |
|                           | Gravida when procedure done                                                                                    |                                                                                                                                                                                                                                                                                                                                                                                                                                                                                                                                                                                                                                                                                                                                                        |                           |                          |                                                   |                                                                                   |   |                              |   |
|                           | Gestational age during procedure                                                                               |                                                                                                                                                                                                                                                                                                                                                                                                                                                                                                                                                                                                                                                                                                                                                        |                           |                          |                                                   |                                                                                   |   |                              |   |
|                           | Institution where done                                                                                         |                                                                                                                                                                                                                                                                                                                                                                                                                                                                                                                                                                                                                                                                                                                                                        |                           |                          |                                                   |                                                                                   |   |                              |   |
| <b>C13</b>                | Post-partum interventions (Only for cases registered in TNPHDR within 6weeks of delivery)                      |                                                                                                                                                                                                                                                                                                                                                                                                                                                                                                                                                                                                                                                                                                                                                        | <input type="radio"/> Yes |                          | <input type="radio"/> No (If yes, specify)        |                                                                                   |   |                              |   |
|                           | Name of the procedure                                                                                          |                                                                                                                                                                                                                                                                                                                                                                                                                                                                                                                                                                                                                                                                                                                                                        |                           |                          |                                                   |                                                                                   |   |                              |   |
|                           | Post-natal day procedure done                                                                                  |                                                                                                                                                                                                                                                                                                                                                                                                                                                                                                                                                                                                                                                                                                                                                        |                           |                          |                                                   |                                                                                   |   |                              |   |
|                           | Institution where done                                                                                         |                                                                                                                                                                                                                                                                                                                                                                                                                                                                                                                                                                                                                                                                                                                                                        |                           |                          |                                                   |                                                                                   |   |                              |   |

**FIRST VISIT PAGE**

Date

|   |   |   |   |   |   |   |   |
|---|---|---|---|---|---|---|---|
| D | D | M | M | Y | Y | Y | Y |
|---|---|---|---|---|---|---|---|

**D1 PATIENT SYMPTOMS**

**D1.1 NYHA CLASS**     Class I                       Class II                       Class III                       Class IV

Presenting symptoms (tick all applicable)

|                          |                          |                          |                          |                            |                            |                           |                          |
|--------------------------|--------------------------|--------------------------|--------------------------|----------------------------|----------------------------|---------------------------|--------------------------|
| <b>D1.2</b><br>Nil       | <b>D1.3</b><br>Dyspnea   | <b>D1.4</b><br>PND       | <b>D1.5</b><br>Orthopnea | <b>D1.6</b><br>Palpitation | <b>D1.7</b><br>Pedal edema | <b>D1.8</b><br>Chest pain | <b>D1.9</b><br>Syncope   |
| <input type="checkbox"/> | <input type="checkbox"/> | <input type="checkbox"/> | <input type="checkbox"/> | <input type="checkbox"/>   | <input type="checkbox"/>   | <input type="checkbox"/>  | <input type="checkbox"/> |

**D1.10**  Others (Specify):

**D2 CLINICAL SIGNS**

|                       |                       |                       |
|-----------------------|-----------------------|-----------------------|
| <b>D2.1</b> Ht (cm)   | <b>D2.2</b> Wt (Kg)   | <b>D2.3</b> RR (/min) |
| <b>D2.4</b> HR (/min) | <b>D2.5</b> BP(mm Hg) | <b>D2.6</b> SPO2 (%)  |

**D2.7** CVS: S1 \_\_\_\_\_ S2 \_\_\_\_\_  
Murmur:  Yes  No     Sys     Dias  
Gallop:  Yes  No     LVS3     RVS3

**D2.8** JVP  
 Normal  
 Elevated

**D2.9** RS     Normal     Abnormal  
 Crepitations  
 Rhonchi/ Wheeze

**D3 BASELINE INVESTIGATIONS:**

|                                    |                                            |
|------------------------------------|--------------------------------------------|
| <b>D3.1</b> Blood Sugar (mg/dl)    | <b>D3.4</b> Hb (g/dl)                      |
| <b>D3.2</b> Blood Urea (mg/dl)     | <b>D3.5</b> Others Relevant investigations |
| <b>D3.3</b> Sr. Creatinine (mg/dl) |                                            |

**D3.6 ECG**     Normal     Abnormal. If abnormal, Choose:  
 AF     SVT     VT     1°AVB     2° AVB     CHB     ST↑     ST↓     Others  
**Others, Specify:**

**D4 RISK ASSESSMENT AND TRIAGE**

**D4.1** Modified WHO Risk assessment Scale:  m WHO I     m WHO II     m WHO II-III     m WHO III     m WHO IV

**D4.2 CARPREG SCORE:** (Tick the appropriate box)

| S. No | Patient Variable                                                                | Yes | No |
|-------|---------------------------------------------------------------------------------|-----|----|
| 1     | Prior cardiac event [Heart Failure, Stroke, TIA before pregnancy, arrhythmia]   |     |    |
| 2     | Baseline NYHA III / IV or Cyanosis                                              |     |    |
| 3     | Left Heart Obstruction [MVA < 2sq.cm, AVA < 1.5 sq.cm, Peak LVOT gr > 30 mm Hg] |     |    |
| 4     | Reduced systemic ventricular systolic function < 40%                            |     |    |

| <b>D4.3 CARPREG II SCORE:</b> (Tick the appropriate box) |                                         |     |    | <b>D4.4 ZAHARA SCORE:</b> (Tick the appropriate box) |                                                        |     |    |
|----------------------------------------------------------|-----------------------------------------|-----|----|------------------------------------------------------|--------------------------------------------------------|-----|----|
| S. No                                                    | Patient Variable                        | Yes | No | S. No                                                | Patient Variable                                       | Yes | No |
| 1                                                        | Prior cardiac event/ arrhythmia         |     |    | 1                                                    | History of arrhythmic events                           |     |    |
| 2                                                        | Baseline NYHA III / IV or Cyanosis      |     |    | 2                                                    | Baseline NYHA III or IV                                |     |    |
| 3                                                        | Mechanical prosthetic valves            |     |    | 3                                                    | LVOT obstruction >50 mm Hg                             |     |    |
| 4                                                        | Ventricular dysfunction                 |     |    | 4                                                    | Mechanical valve prosthesis                            |     |    |
| 5                                                        | High Risk Lt sided valve disease, LVOTO |     |    | 5                                                    | Cardiac drugs pre-pregnancy use                        |     |    |
| 6                                                        | Pulmonary Hypertension                  |     |    | 6                                                    | CCHD [repaired or unrepaired]                          |     |    |
| 7                                                        | CAD                                     |     |    | 7                                                    | Moderate to severe sub pulmonic AV valve regurgitation |     |    |
| 8                                                        | High risk aortopathy                    |     |    | 8                                                    | Moderate to severe systemic AV valve regurgitation     |     |    |
| 9                                                        | No Prior cardiac interventions          |     |    |                                                      |                                                        |     |    |
| 10                                                       | Late pregnancy assessment               |     |    |                                                      |                                                        |     |    |

|                                                                                                                                                          |                                                                                                                                                                                                                                                                                      |                                                                                                                                                                                                                          |                                                                                                                                                                                                                                                                                                                                                                                                     |                                                                                                                        |
|----------------------------------------------------------------------------------------------------------------------------------------------------------|--------------------------------------------------------------------------------------------------------------------------------------------------------------------------------------------------------------------------------------------------------------------------------------|--------------------------------------------------------------------------------------------------------------------------------------------------------------------------------------------------------------------------|-----------------------------------------------------------------------------------------------------------------------------------------------------------------------------------------------------------------------------------------------------------------------------------------------------------------------------------------------------------------------------------------------------|------------------------------------------------------------------------------------------------------------------------|
| <b>D5</b>                                                                                                                                                | <b>ECHOCARDIOGRAPHIC ASSESSMENT</b> <input type="radio"/> Normal <input type="radio"/> Abnormal                                                                                                                                                                                      |                                                                                                                                                                                                                          |                                                                                                                                                                                                                                                                                                                                                                                                     |                                                                                                                        |
| <b>D5.1 Situs</b>                                                                                                                                        | <input type="radio"/> Solitus <input type="radio"/> Inversus <sup>†</sup> <input type="radio"/> Ambiguus <sup>†</sup>                                                                                                                                                                |                                                                                                                                                                                                                          | <b>D5.2 Position</b>                                                                                                                                                                                                                                                                                                                                                                                | <input type="radio"/> Dextrocardia <sup>†</sup> <input type="radio"/> Levocardia                                       |
| <b>D5.3 AV concordance</b>                                                                                                                               | <input type="radio"/> Concordant <input type="radio"/> Discordant <sup>†</sup>                                                                                                                                                                                                       |                                                                                                                                                                                                                          | <b>VA concordance</b>                                                                                                                                                                                                                                                                                                                                                                               | <input type="radio"/> Concordant <input type="radio"/> Discordant <sup>†</sup>                                         |
| <b>D5.4 Chamber description</b>                                                                                                                          |                                                                                                                                                                                                                                                                                      |                                                                                                                                                                                                                          |                                                                                                                                                                                                                                                                                                                                                                                                     |                                                                                                                        |
| Morphological LA                                                                                                                                         | Normal: <input type="radio"/> Yes <input type="radio"/> No                                                                                                                                                                                                                           | <input type="radio"/> Dilated                                                                                                                                                                                            | <input type="radio"/> Hypoplastic <sup>†</sup>                                                                                                                                                                                                                                                                                                                                                      | <i># Kindly fill form I</i><br><i>† Kindly fill Form J</i><br><i>‡ Kindly fill form K</i><br><i>Kindly fill form L</i> |
| Morphological RA                                                                                                                                         | Normal: <input type="radio"/> Yes <input type="radio"/> No                                                                                                                                                                                                                           | <input type="radio"/> Dilated                                                                                                                                                                                            | <input type="radio"/> Hypoplastic <sup>†</sup>                                                                                                                                                                                                                                                                                                                                                      |                                                                                                                        |
| Morphological LV                                                                                                                                         | Normal: <input type="radio"/> Yes <input type="radio"/> No                                                                                                                                                                                                                           | <input type="radio"/> Dilated                                                                                                                                                                                            | <input type="radio"/> Hypoplastic <sup>†</sup>                                                                                                                                                                                                                                                                                                                                                      |                                                                                                                        |
| Morphological RV                                                                                                                                         | Normal: <input type="radio"/> Yes <input type="radio"/> No                                                                                                                                                                                                                           | <input type="radio"/> Dilated                                                                                                                                                                                            | <input type="radio"/> Hypoplastic <sup>†</sup>                                                                                                                                                                                                                                                                                                                                                      |                                                                                                                        |
| <b>D5.5 Ventricular function</b>                                                                                                                         |                                                                                                                                                                                                                                                                                      |                                                                                                                                                                                                                          |                                                                                                                                                                                                                                                                                                                                                                                                     |                                                                                                                        |
| Wall Motion: <input type="radio"/> Normal <input type="radio"/> Regional wall motion abnormalities <input type="radio"/> Global Hypokinesia <sup>‡</sup> |                                                                                                                                                                                                                                                                                      |                                                                                                                                                                                                                          |                                                                                                                                                                                                                                                                                                                                                                                                     |                                                                                                                        |
| LV systolic function                                                                                                                                     | LVID                                                                                                                                                                                                                                                                                 | Diastole(mm)                                                                                                                                                                                                             | EF and LV function                                                                                                                                                                                                                                                                                                                                                                                  |                                                                                                                        |
|                                                                                                                                                          |                                                                                                                                                                                                                                                                                      | Systole(mm)                                                                                                                                                                                                              | >54%                                                                                                                                                                                                                                                                                                                                                                                                | <input type="radio"/> Normal <sup>‡</sup>                                                                              |
|                                                                                                                                                          | EF%                                                                                                                                                                                                                                                                                  |                                                                                                                                                                                                                          | 40-54%                                                                                                                                                                                                                                                                                                                                                                                              | <input type="radio"/> Mild LV systolic dysfunction <sup>‡</sup>                                                        |
| LV diastolic function                                                                                                                                    | E(cm/s)                                                                                                                                                                                                                                                                              |                                                                                                                                                                                                                          | 30-40%                                                                                                                                                                                                                                                                                                                                                                                              | <input type="radio"/> Moderate LV systolic dysfunction <sup>‡</sup>                                                    |
|                                                                                                                                                          | A(cm/s)                                                                                                                                                                                                                                                                              |                                                                                                                                                                                                                          | <30%                                                                                                                                                                                                                                                                                                                                                                                                | <input type="radio"/> Severe LV systolic dysfunction <sup>‡</sup>                                                      |
| RV systolic function                                                                                                                                     | <input type="radio"/> Normal <input type="radio"/> Abnormal                                                                                                                                                                                                                          | TAPSE (mm)                                                                                                                                                                                                               |                                                                                                                                                                                                                                                                                                                                                                                                     | Sa'                                                                                                                    |
| <b>D5.6 Valve morphology and function</b>                                                                                                                |                                                                                                                                                                                                                                                                                      |                                                                                                                                                                                                                          |                                                                                                                                                                                                                                                                                                                                                                                                     |                                                                                                                        |
| Mitral                                                                                                                                                   | <input type="radio"/> Native<br><input type="radio"/> Prosthetic <sup>#</sup>                                                                                                                                                                                                        | Structure <input type="radio"/> Normal <input type="radio"/> Abnormal<br><input type="checkbox"/> Prolapse <input type="checkbox"/> Thickened<br><input type="checkbox"/> Degenerative <input type="checkbox"/> Flial    | Function <input type="radio"/> Normal <input type="radio"/> Abnormal<br><input type="checkbox"/> Stenotic <input type="radio"/> Mild <input type="radio"/> Moderate <input type="radio"/> Severe<br>MVOA _____ Cm <sup>2</sup><br>MV Gradient: Mean _____ Peak _____<br><input type="checkbox"/> Regurgitant <input type="radio"/> Mild <input type="radio"/> Moderate <input type="radio"/> Severe |                                                                                                                        |
| Aortic                                                                                                                                                   | <input type="radio"/> Native<br><input type="radio"/> Prosthetic <sup>#</sup>                                                                                                                                                                                                        | Structure <input type="radio"/> Normal <input type="radio"/> Abnormal<br><input type="checkbox"/> Prolapse <input type="checkbox"/> Thickened<br><input type="checkbox"/> Degenerative <input type="checkbox"/> Calcific | Function <input type="radio"/> Normal <input type="radio"/> Abnormal<br><input type="checkbox"/> Stenotic <sup>A</sup> <input type="radio"/> Mild <input type="radio"/> Moderate <input type="radio"/> Severe<br>Gradient: Mean _____ Peak _____<br><input type="checkbox"/> Regurgitant <input type="radio"/> Mild <input type="radio"/> Moderate <input type="radio"/> Severe                     |                                                                                                                        |
| Tricuspid                                                                                                                                                | <input type="radio"/> Native<br><input type="radio"/> Prosthetic <sup>#</sup>                                                                                                                                                                                                        | If native<br><input type="radio"/> Normal<br><input type="radio"/> Prolapse                                                                                                                                              | Function <input type="radio"/> Normal <input type="radio"/> Abnormal<br><input type="checkbox"/> Stenotic <input type="radio"/> Mild <input type="radio"/> Moderate <input type="radio"/> Severe<br>Gradient: Mean _____ Peak _____<br><input type="checkbox"/> Regurgitant <input type="radio"/> Mild <input type="radio"/> Moderate <input type="radio"/> Severe                                  |                                                                                                                        |
| Pulmonary                                                                                                                                                | <input type="radio"/> Native<br><input type="radio"/> Prosthetic <sup>#</sup>                                                                                                                                                                                                        | If native<br><input type="radio"/> Normal <input type="radio"/> Absent<br><input type="radio"/> Dooming                                                                                                                  | Function <input type="radio"/> Normal <input type="radio"/> Abnormal<br><input type="checkbox"/> Stenotic <sup>A</sup> <input type="radio"/> Mild <input type="radio"/> Moderate <input type="radio"/> Severe<br>Gradient: Mean _____ Peak _____<br><input type="checkbox"/> Regurgitant <input type="radio"/> Mild <input type="radio"/> Moderate <input type="radio"/> Severe                     |                                                                                                                        |
| <b>D5.7 Pulmonary pressures</b>                                                                                                                          |                                                                                                                                                                                                                                                                                      |                                                                                                                                                                                                                          |                                                                                                                                                                                                                                                                                                                                                                                                     |                                                                                                                        |
| Tricuspid regurgitation-TRPG(mmHg):                                                                                                                      |                                                                                                                                                                                                                                                                                      | Pulmonary regurgitation-Peak PR(mmHg):                                                                                                                                                                                   |                                                                                                                                                                                                                                                                                                                                                                                                     |                                                                                                                        |
| <b>Grading of PHT</b>                                                                                                                                    | <input type="checkbox"/> Nil                                                                                                                                                                                                                                                         | <input type="checkbox"/> Mild PHT                                                                                                                                                                                        | <input type="checkbox"/> Moderate PHT                                                                                                                                                                                                                                                                                                                                                               | <input type="checkbox"/> Severe PHT                                                                                    |
| TPRG                                                                                                                                                     | <30                                                                                                                                                                                                                                                                                  | 30-45                                                                                                                                                                                                                    | 45-60                                                                                                                                                                                                                                                                                                                                                                                               | >60                                                                                                                    |
| Peak PR                                                                                                                                                  | <15                                                                                                                                                                                                                                                                                  | 15-35                                                                                                                                                                                                                    | 35-45                                                                                                                                                                                                                                                                                                                                                                                               | >45                                                                                                                    |
| <b>D5.8 IAS</b>                                                                                                                                          | <input type="radio"/> Intact <input type="radio"/> Defective <sup>†</sup>                                                                                                                                                                                                            |                                                                                                                                                                                                                          |                                                                                                                                                                                                                                                                                                                                                                                                     |                                                                                                                        |
| <b>D5.9 IVS</b>                                                                                                                                          | <input type="radio"/> Intact <input type="radio"/> Defective <sup>†</sup>                                                                                                                                                                                                            |                                                                                                                                                                                                                          |                                                                                                                                                                                                                                                                                                                                                                                                     |                                                                                                                        |
| <b>D5.10 Other Shunts<sup>†</sup></b>                                                                                                                    | <input type="checkbox"/> PDA <input type="checkbox"/> APW <input type="checkbox"/> RSOV <input type="checkbox"/> Others                                                                                                                                                              |                                                                                                                                                                                                                          |                                                                                                                                                                                                                                                                                                                                                                                                     |                                                                                                                        |
| <b>D5.11 Pericardium</b>                                                                                                                                 | <input type="checkbox"/> Normal <input type="checkbox"/> Thickened <input type="checkbox"/> Effusion <input type="radio"/> Mild <input type="radio"/> Moderate <input type="radio"/> Massive                                                                                         |                                                                                                                                                                                                                          |                                                                                                                                                                                                                                                                                                                                                                                                     |                                                                                                                        |
| <b>D5.12 Aorta</b>                                                                                                                                       | <input type="radio"/> Normal <input type="radio"/> Abnormal. If Abnormal, Specify <input type="radio"/> Dilated <input type="radio"/> Coarctation <input type="radio"/> Others                                                                                                       |                                                                                                                                                                                                                          |                                                                                                                                                                                                                                                                                                                                                                                                     |                                                                                                                        |
| <b>D5.13 Others</b>                                                                                                                                      | <input type="checkbox"/> Vegetations <input type="checkbox"/> Thrombus                                                                                                                                                                                                               |                                                                                                                                                                                                                          |                                                                                                                                                                                                                                                                                                                                                                                                     |                                                                                                                        |
| <b>D6</b>                                                                                                                                                | TNPHDR Risk category (as per triage): <input type="radio"/> LOW RISK <input type="radio"/> HIGH RISK                                                                                                                                                                                 |                                                                                                                                                                                                                          |                                                                                                                                                                                                                                                                                                                                                                                                     |                                                                                                                        |
| <b>D7</b>                                                                                                                                                | Specific Advice in the visit(if any) : <input type="checkbox"/> Nil <input type="checkbox"/> Hospitalization <input type="checkbox"/> Change of medication<br><input type="checkbox"/> Advice intervention <input type="radio"/> Cardiac <input type="radio"/> Others, specify _____ |                                                                                                                                                                                                                          |                                                                                                                                                                                                                                                                                                                                                                                                     |                                                                                                                        |
| <b>D8</b>                                                                                                                                                | Date of next follow up:                                                                                                                                                                                                                                                              |                                                                                                                                                                                                                          | D                                                                                                                                                                                                                                                                                                                                                                                                   | D                                                                                                                      |
|                                                                                                                                                          |                                                                                                                                                                                                                                                                                      |                                                                                                                                                                                                                          | M                                                                                                                                                                                                                                                                                                                                                                                                   | M                                                                                                                      |
|                                                                                                                                                          |                                                                                                                                                                                                                                                                                      |                                                                                                                                                                                                                          | Y                                                                                                                                                                                                                                                                                                                                                                                                   | Y                                                                                                                      |
|                                                                                                                                                          |                                                                                                                                                                                                                                                                                      |                                                                                                                                                                                                                          | Y                                                                                                                                                                                                                                                                                                                                                                                                   | Y                                                                                                                      |

### E. DRUG PAGE-USE AND DOSAGE

*(tick the relevant drugs and mention the dosage used)*

| NO | DRUG                | E1<br>PRE- PREGNANCY     |        | E2<br>I TRIMESTER        |        | E3<br>II TRIMESTER       |        | E4<br>III TRIMESTER      |        | E5<br>PERIPARTUM         |        |
|----|---------------------|--------------------------|--------|--------------------------|--------|--------------------------|--------|--------------------------|--------|--------------------------|--------|
|    |                     | <input type="checkbox"/> | DOSAGE | <input type="checkbox"/> | DOSAGE | <input type="checkbox"/> | DOSAGE | <input type="checkbox"/> | DOSAGE | <input type="checkbox"/> | DOSAGE |
| 1  | Penicillin          | <input type="checkbox"/> |        | <input type="checkbox"/> |        | <input type="checkbox"/> |        | <input type="checkbox"/> |        | <input type="checkbox"/> |        |
| 2  | Warfarin            | <input type="checkbox"/> |        | <input type="checkbox"/> |        | <input type="checkbox"/> |        | <input type="checkbox"/> |        | <input type="checkbox"/> |        |
| 3  | Acenocoumarol       | <input type="checkbox"/> |        | <input type="checkbox"/> |        | <input type="checkbox"/> |        | <input type="checkbox"/> |        | <input type="checkbox"/> |        |
| 4  | Phenindione         | <input type="checkbox"/> |        | <input type="checkbox"/> |        | <input type="checkbox"/> |        | <input type="checkbox"/> |        | <input type="checkbox"/> |        |
| 5  | Aspirin             | <input type="checkbox"/> |        | <input type="checkbox"/> |        | <input type="checkbox"/> |        | <input type="checkbox"/> |        | <input type="checkbox"/> |        |
| 6  | Clopidogrel         | <input type="checkbox"/> |        | <input type="checkbox"/> |        | <input type="checkbox"/> |        | <input type="checkbox"/> |        | <input type="checkbox"/> |        |
| 7  | Nitrates            | <input type="checkbox"/> |        | <input type="checkbox"/> |        | <input type="checkbox"/> |        | <input type="checkbox"/> |        | <input type="checkbox"/> |        |
| 8  | Atorvastatin        | <input type="checkbox"/> |        | <input type="checkbox"/> |        | <input type="checkbox"/> |        | <input type="checkbox"/> |        | <input type="checkbox"/> |        |
| 9  | Rosuvastatin        | <input type="checkbox"/> |        | <input type="checkbox"/> |        | <input type="checkbox"/> |        | <input type="checkbox"/> |        | <input type="checkbox"/> |        |
| 10 | Verapamil           | <input type="checkbox"/> |        | <input type="checkbox"/> |        | <input type="checkbox"/> |        | <input type="checkbox"/> |        | <input type="checkbox"/> |        |
| 11 | Nifedipine          | <input type="checkbox"/> |        | <input type="checkbox"/> |        | <input type="checkbox"/> |        | <input type="checkbox"/> |        | <input type="checkbox"/> |        |
| 12 | Diltiazem           | <input type="checkbox"/> |        | <input type="checkbox"/> |        | <input type="checkbox"/> |        | <input type="checkbox"/> |        | <input type="checkbox"/> |        |
| 13 | Atenolol            | <input type="checkbox"/> |        | <input type="checkbox"/> |        | <input type="checkbox"/> |        | <input type="checkbox"/> |        | <input type="checkbox"/> |        |
| 14 | Metoprolol          | <input type="checkbox"/> |        | <input type="checkbox"/> |        | <input type="checkbox"/> |        | <input type="checkbox"/> |        | <input type="checkbox"/> |        |
| 15 | Other BBs           | <input type="checkbox"/> |        | <input type="checkbox"/> |        | <input type="checkbox"/> |        | <input type="checkbox"/> |        | <input type="checkbox"/> |        |
| 16 | Digoxin             | <input type="checkbox"/> |        | <input type="checkbox"/> |        | <input type="checkbox"/> |        | <input type="checkbox"/> |        | <input type="checkbox"/> |        |
| 17 | Frusemide           | <input type="checkbox"/> |        | <input type="checkbox"/> |        | <input type="checkbox"/> |        | <input type="checkbox"/> |        | <input type="checkbox"/> |        |
| 18 | Spironolactone      | <input type="checkbox"/> |        | <input type="checkbox"/> |        | <input type="checkbox"/> |        | <input type="checkbox"/> |        | <input type="checkbox"/> |        |
| 19 | Hydrochlorothiazide | <input type="checkbox"/> |        | <input type="checkbox"/> |        | <input type="checkbox"/> |        | <input type="checkbox"/> |        | <input type="checkbox"/> |        |
| 20 | Enalapril           | <input type="checkbox"/> |        | <input type="checkbox"/> |        | <input type="checkbox"/> |        | <input type="checkbox"/> |        | <input type="checkbox"/> |        |
| 21 | Ramipril            | <input type="checkbox"/> |        | <input type="checkbox"/> |        | <input type="checkbox"/> |        | <input type="checkbox"/> |        | <input type="checkbox"/> |        |
| 22 | Other ACEIs         | <input type="checkbox"/> |        | <input type="checkbox"/> |        | <input type="checkbox"/> |        | <input type="checkbox"/> |        | <input type="checkbox"/> |        |
| 23 | Losartan            | <input type="checkbox"/> |        | <input type="checkbox"/> |        | <input type="checkbox"/> |        | <input type="checkbox"/> |        | <input type="checkbox"/> |        |
| 24 | Telmisartan         | <input type="checkbox"/> |        | <input type="checkbox"/> |        | <input type="checkbox"/> |        | <input type="checkbox"/> |        | <input type="checkbox"/> |        |
| 25 | Other ARBs          | <input type="checkbox"/> |        | <input type="checkbox"/> |        | <input type="checkbox"/> |        | <input type="checkbox"/> |        | <input type="checkbox"/> |        |
| 26 | Sildenafil          | <input type="checkbox"/> |        | <input type="checkbox"/> |        | <input type="checkbox"/> |        | <input type="checkbox"/> |        | <input type="checkbox"/> |        |
| 27 | Bosentan            | <input type="checkbox"/> |        | <input type="checkbox"/> |        | <input type="checkbox"/> |        | <input type="checkbox"/> |        | <input type="checkbox"/> |        |
| 28 | Amiodarone          | <input type="checkbox"/> |        | <input type="checkbox"/> |        | <input type="checkbox"/> |        | <input type="checkbox"/> |        | <input type="checkbox"/> |        |
| 29 | Oral anti-diabetics | <input type="checkbox"/> |        | <input type="checkbox"/> |        | <input type="checkbox"/> |        | <input type="checkbox"/> |        | <input type="checkbox"/> |        |
| 30 | Insulin             | <input type="checkbox"/> |        | <input type="checkbox"/> |        | <input type="checkbox"/> |        | <input type="checkbox"/> |        | <input type="checkbox"/> |        |
| 31 | Other drugs         | <input type="checkbox"/> |        | <input type="checkbox"/> |        | <input type="checkbox"/> |        | <input type="checkbox"/> |        | <input type="checkbox"/> |        |



**SECOND VISIT PAGE**

Date

|   |   |   |   |   |   |   |   |
|---|---|---|---|---|---|---|---|
| D | D | M | M | Y | Y | Y | Y |
|---|---|---|---|---|---|---|---|

|                                                                                                                                             |                          |                          |                          |                          |                          |                          |                          |  |
|---------------------------------------------------------------------------------------------------------------------------------------------|--------------------------|--------------------------|--------------------------|--------------------------|--------------------------|--------------------------|--------------------------|--|
| <b>F1</b>                                                                                                                                   | <b>PATIENT SYMPTOMS</b>  |                          |                          |                          |                          |                          |                          |  |
| F1.1 NYHA CLASS <input type="radio"/> Class I <input type="radio"/> Class II <input type="radio"/> Class III <input type="radio"/> Class IV |                          |                          |                          |                          |                          |                          |                          |  |
| Presenting symptoms (tick all applicable)                                                                                                   |                          |                          |                          |                          |                          |                          |                          |  |
| F1.2<br>Nil                                                                                                                                 | F1.3<br>Dyspnea          | F1.4<br>PND              | F1.5<br>Orthopnea        | F1.6<br>Palpitation      | F1.7<br>Pedal edema      | F1.8<br>Chest pain       | F1.9<br>Syncope          |  |
| <input type="checkbox"/>                                                                                                                    | <input type="checkbox"/> | <input type="checkbox"/> | <input type="checkbox"/> | <input type="checkbox"/> | <input type="checkbox"/> | <input type="checkbox"/> | <input type="checkbox"/> |  |
| F1.10 <input type="checkbox"/> Others (Specify):                                                                                            |                          |                          |                          |                          |                          |                          |                          |  |

|                                                                                                                                                                                                                                                                                                                                                                                               |                                 |                |  |                                                                            |  |                                                                                                                                                          |  |  |
|-----------------------------------------------------------------------------------------------------------------------------------------------------------------------------------------------------------------------------------------------------------------------------------------------------------------------------------------------------------------------------------------------|---------------------------------|----------------|--|----------------------------------------------------------------------------|--|----------------------------------------------------------------------------------------------------------------------------------------------------------|--|--|
| <b>F2</b>                                                                                                                                                                                                                                                                                                                                                                                     | <b>CLINICAL SIGNS &amp; ECG</b> |                |  |                                                                            |  |                                                                                                                                                          |  |  |
| F2.1 Ht (cm)                                                                                                                                                                                                                                                                                                                                                                                  |                                 | F2.2 Wt (Kg)   |  | F2.3 RR (/min)                                                             |  |                                                                                                                                                          |  |  |
| F2.4 HR (/min)                                                                                                                                                                                                                                                                                                                                                                                |                                 | F2.5 BP(mm Hg) |  | F2.6 SPO2 (%)                                                              |  |                                                                                                                                                          |  |  |
| F2.7 CVS: S1 _____ S2 _____<br>Murmur: <input type="radio"/> Yes <input type="radio"/> No <input type="checkbox"/> Sys <input type="checkbox"/> Dias<br>Gallop: <input type="radio"/> Yes <input type="radio"/> No <input type="checkbox"/> LVS3 <input type="checkbox"/> RVS3                                                                                                                |                                 |                |  | F2.8 JVP<br><input type="radio"/> Normal<br><input type="radio"/> Elevated |  | F2.9 RS <input type="radio"/> Normal <input type="radio"/> Abnormal<br><input type="checkbox"/> Crepitations<br><input type="checkbox"/> Rhonchi/ Wheeze |  |  |
| F2.10 ECG <input type="radio"/> Normal <input type="radio"/> Abnormal. If abnormal, Choose:<br><input type="checkbox"/> AF <input type="checkbox"/> SVT <input type="checkbox"/> VT <input type="checkbox"/> 1°AVB <input type="checkbox"/> 2° AVB <input type="checkbox"/> CHB <input type="checkbox"/> ST↑ <input type="checkbox"/> ST↓ <input type="checkbox"/> Others<br>Others, Specify: |                                 |                |  |                                                                            |  |                                                                                                                                                          |  |  |

|                                                                                                                                                |                                     |                                                                                                                                       |                                                                                                                             |                                          |  |                                                                                               |  |  |
|------------------------------------------------------------------------------------------------------------------------------------------------|-------------------------------------|---------------------------------------------------------------------------------------------------------------------------------------|-----------------------------------------------------------------------------------------------------------------------------|------------------------------------------|--|-----------------------------------------------------------------------------------------------|--|--|
| <b>F3</b>                                                                                                                                      | <b>ECHOCARDIOGRAPHIC ASSESSMENT</b> |                                                                                                                                       |                                                                                                                             |                                          |  |                                                                                               |  |  |
| <b>Ventricular function</b>                                                                                                                    |                                     |                                                                                                                                       |                                                                                                                             | <b>Pulmonary pressures</b>               |  |                                                                                               |  |  |
| Wall Motion: <input type="radio"/> Normal <input type="radio"/> Global Hypokinesia<br><input type="radio"/> Regional wall motion abnormalities |                                     |                                                                                                                                       |                                                                                                                             | Tricuspid regurgitation                  |  | TRPG (mmHg) :                                                                                 |  |  |
| LV systolic function                                                                                                                           |                                     | LVID                                                                                                                                  | Diastole(mm)                                                                                                                | Pulmonary regurgitation                  |  | Peak PR (mmHg):                                                                               |  |  |
|                                                                                                                                                |                                     |                                                                                                                                       | Systole(mm)                                                                                                                 | <b>Shunt lesion (Nature of shunt)</b>    |  | <input type="radio"/> L→R <input type="radio"/> R→L<br><input type="radio"/> Bi directional   |  |  |
|                                                                                                                                                |                                     | EF%                                                                                                                                   |                                                                                                                             | <b>Pericardial effusion (if present)</b> |  | <input type="radio"/> Mild<br><input type="radio"/> Moderate<br><input type="radio"/> Massive |  |  |
| LV diastolic function                                                                                                                          |                                     | E(cm/s)                                                                                                                               |                                                                                                                             | <b>Others</b>                            |  | <input type="checkbox"/> Vegetations <input type="checkbox"/> Thrombus                        |  |  |
|                                                                                                                                                |                                     | A(cm/s)                                                                                                                               |                                                                                                                             |                                          |  |                                                                                               |  |  |
| RV systolic function                                                                                                                           |                                     | <input type="radio"/> Normal <input type="radio"/> Abnormal<br>TAPSE (mm) _____ Sa' _____                                             |                                                                                                                             |                                          |  |                                                                                               |  |  |
| <b>Valve function ( if prosthetic valve kindly fill form I )</b>                                                                               |                                     |                                                                                                                                       |                                                                                                                             |                                          |  |                                                                                               |  |  |
| Mitral                                                                                                                                         | <input type="checkbox"/> Normal     | <input type="checkbox"/> Stenotic <input type="radio"/> Mild <input type="radio"/> Moderate <input type="radio"/> Severe              | <input type="checkbox"/> Regurgitant <input type="radio"/> Mild <input type="radio"/> Moderate <input type="radio"/> Severe | MVOA: _____ cm <sup>2</sup>              |  | Mean Gradient:<br>Peak gradient:                                                              |  |  |
| Aortic                                                                                                                                         | <input type="checkbox"/> Normal     | <input type="checkbox"/> Stenotic <sup>Δ</sup> <input type="radio"/> Mild <input type="radio"/> Moderate <input type="radio"/> Severe | <input type="checkbox"/> Regurgitant <input type="radio"/> Mild <input type="radio"/> Moderate <input type="radio"/> Severe | Mean Gradient:<br>Peak gradient          |  |                                                                                               |  |  |
|                                                                                                                                                |                                     | <sup>Δ</sup> kindly fill form L                                                                                                       |                                                                                                                             |                                          |  |                                                                                               |  |  |
| Tricuspid                                                                                                                                      | <input type="checkbox"/> Normal     | <input type="checkbox"/> Stenotic <input type="radio"/> Mild <input type="radio"/> Moderate <input type="radio"/> Severe              | <input type="checkbox"/> Regurgitant <input type="radio"/> Mild <input type="radio"/> Moderate <input type="radio"/> Severe | Mean Gradient:<br>Peak gradient          |  |                                                                                               |  |  |
| Pulmonary                                                                                                                                      | <input type="checkbox"/> Normal     | <input type="checkbox"/> Stenotic <sup>Δ</sup> <input type="radio"/> Mild <input type="radio"/> Moderate <input type="radio"/> Severe | <input type="checkbox"/> Regurgitant <input type="radio"/> Mild <input type="radio"/> Moderate <input type="radio"/> Severe | Mean Gradient:<br>Peak gradient          |  |                                                                                               |  |  |
|                                                                                                                                                |                                     | <sup>Δ</sup> kindly fill form L                                                                                                       |                                                                                                                             |                                          |  |                                                                                               |  |  |

|                                                                                                                         |                                                                                                                                                                                                                                                                                |   |   |   |   |   |   |   |   |   |   |   |   |   |   |
|-------------------------------------------------------------------------------------------------------------------------|--------------------------------------------------------------------------------------------------------------------------------------------------------------------------------------------------------------------------------------------------------------------------------|---|---|---|---|---|---|---|---|---|---|---|---|---|---|
| <b>F4</b>                                                                                                               | Specific Advice in the visit (if any) : <input type="checkbox"/> Nil <input type="checkbox"/> Hospitalization <input type="checkbox"/> Change of medication<br><input type="checkbox"/> Intervention <input type="radio"/> Cardiac <input type="radio"/> Others, specify _____ |   |   |   |   |   |   |   |   |   |   |   |   |   |   |
| Name of the procedure: _____                                                                                            |                                                                                                                                                                                                                                                                                |   |   |   |   |   |   |   |   |   |   |   |   |   |   |
| Date : _____                                                                                                            |                                                                                                                                                                                                                                                                                |   |   |   |   |   |   |   |   |   |   |   |   |   |   |
| <table border="1"> <tr> <td>D</td><td>D</td><td>M</td><td>M</td><td>Y</td><td>Y</td><td>Y</td><td>Y</td> </tr> </table> |                                                                                                                                                                                                                                                                                |   |   |   |   |   |   | D | D | M | M | Y | Y | Y | Y |
| D                                                                                                                       | D                                                                                                                                                                                                                                                                              | M | M | Y | Y | Y | Y |   |   |   |   |   |   |   |   |

|           |                                                                                                       |  |  |  |  |  |  |  |
|-----------|-------------------------------------------------------------------------------------------------------|--|--|--|--|--|--|--|
| <b>F5</b> | TNP HDR Risk category (as per triage): <input type="radio"/> LOW RISK <input type="radio"/> HIGH RISK |  |  |  |  |  |  |  |
|-----------|-------------------------------------------------------------------------------------------------------|--|--|--|--|--|--|--|

|           |                         |   |                                                                                                                         |   |   |   |   |  |   |   |   |   |   |   |   |   |
|-----------|-------------------------|---|-------------------------------------------------------------------------------------------------------------------------|---|---|---|---|--|---|---|---|---|---|---|---|---|
| <b>F6</b> | Date of next follow up: |   | <table border="1"> <tr> <td>D</td><td>D</td><td>M</td><td>M</td><td>Y</td><td>Y</td><td>Y</td><td>Y</td> </tr> </table> |   |   |   |   |  | D | D | M | M | Y | Y | Y | Y |
| D         | D                       | M | M                                                                                                                       | Y | Y | Y | Y |  |   |   |   |   |   |   |   |   |

**THIRD VISIT PAGE**

Date

|   |   |   |   |   |   |   |   |
|---|---|---|---|---|---|---|---|
| D | D | M | M | Y | Y | Y | Y |
|---|---|---|---|---|---|---|---|

**G1**

**PATIENT SYMPTOMS**

**G1.1 NYHA CLASS**  Class I  Class II  Class III  Class IV

Presenting symptoms (tick all applicable)

| G1.2<br>Nil              | G1.3<br>Dyspnea          | G1.4<br>PND              | G1.5<br>Orthopnea        | G1.6<br>Palpitation      | G1.7<br>Pedal edema      | G1.8<br>Chest pain       | G1.9<br>Syncope          |
|--------------------------|--------------------------|--------------------------|--------------------------|--------------------------|--------------------------|--------------------------|--------------------------|
| <input type="checkbox"/> | <input type="checkbox"/> | <input type="checkbox"/> | <input type="checkbox"/> | <input type="checkbox"/> | <input type="checkbox"/> | <input type="checkbox"/> | <input type="checkbox"/> |

**G1.10**  Others (Specify):

**G2**

**CLINICAL SIGNS & ECG**

|                       |                       |                       |
|-----------------------|-----------------------|-----------------------|
| <b>G2.1</b> Ht (cm)   | <b>G2.2</b> Wt (Kg)   | <b>G2.3</b> RR (/min) |
| <b>G2.4</b> HR (/min) | <b>G2.5</b> BP(mm Hg) | <b>G2.6</b> SPO2 (%)  |

**G2.7**CVS: S1 \_\_\_\_\_ S2 \_\_\_\_\_  
 Murmur:  Yes  No  Sys  Dias  
 Gallop:  Yes  No  LVS3  RVS3

**G2.8** JVP  Normal  Elevated

**G2.9** RS  Normal  Abnormal  
 Crepitations  Rhonchi/ Wheeze

**G2.10** ECG  Normal  Abnormal. If abnormal, Choose:  
 AF  SVT  VT  1°AVB  2° AVB  CHB  ST↑  ST↓  Others  
 Others, Specify:

**G3**

**ECHOCARDIOGRAPHIC ASSESSMENT**

| Ventricular function                                                                                                                        |                                                                                           |                                                                                                                                           | Pulmonary pressures                                                                                                                  |                 |
|---------------------------------------------------------------------------------------------------------------------------------------------|-------------------------------------------------------------------------------------------|-------------------------------------------------------------------------------------------------------------------------------------------|--------------------------------------------------------------------------------------------------------------------------------------|-----------------|
| Wall Motion: <input type="radio"/> Normal <input type="radio"/> Global Hypokinesia <input type="radio"/> Regional wall motion abnormalities |                                                                                           |                                                                                                                                           | Tricuspid regurgitation                                                                                                              | TRPG (mmHg) :   |
| LV systolic function                                                                                                                        | LVID                                                                                      | Diastole(mm)                                                                                                                              | Pulmonary regurgitation                                                                                                              | Peak PR (mmHg): |
|                                                                                                                                             |                                                                                           | Systole(mm)                                                                                                                               | <b>Shunt lesion (Nature of shunt)</b><br><input type="radio"/> L→R <input type="radio"/> R→L<br><input type="radio"/> Bi directional |                 |
|                                                                                                                                             | EF%                                                                                       | <b>Pericardial effusion (if present)</b><br><input type="radio"/> Mild<br><input type="radio"/> Moderate<br><input type="radio"/> Massive |                                                                                                                                      |                 |
| LV diastolic function                                                                                                                       | E(cm/s)                                                                                   |                                                                                                                                           | <b>Others</b><br><input type="checkbox"/> Vegetations <input type="checkbox"/> Thrombus                                              |                 |
|                                                                                                                                             | A(cm/s)                                                                                   |                                                                                                                                           |                                                                                                                                      |                 |
| RV systolic function                                                                                                                        | <input type="radio"/> Normal <input type="radio"/> Abnormal<br>TAPSE (mm) _____ Sa' _____ |                                                                                                                                           |                                                                                                                                      |                 |

**Valve function ( if prosthetic valve kindly fill form I )**

|           |                                 |                                                                                                                                                            |                                                                 |
|-----------|---------------------------------|------------------------------------------------------------------------------------------------------------------------------------------------------------|-----------------------------------------------------------------|
| Mitral    | <input type="checkbox"/> Normal | <input type="checkbox"/> Stenotic <input type="radio"/> Mild <input type="radio"/> Moderate <input type="radio"/> Severe                                   | MVOA: _____ cm <sup>2</sup><br>Mean Gradient:<br>Peak gradient: |
|           |                                 | <input type="checkbox"/> Regurgitant <input type="radio"/> Mild <input type="radio"/> Moderate <input type="radio"/> Severe                                |                                                                 |
| Aortic    | <input type="checkbox"/> Normal | <input type="checkbox"/> Stenotic <sup>Δ</sup> <input type="radio"/> Mild <input type="radio"/> Moderate <input type="radio"/> Severe                      | Mean Gradient:<br>Peak gradient                                 |
|           |                                 | <input type="checkbox"/> Regurgitant <input type="radio"/> Mild <input type="radio"/> Moderate <input type="radio"/> Severe<br><i>Δ kindly fill form L</i> |                                                                 |
| Tricuspid | <input type="checkbox"/> Normal | <input type="checkbox"/> Stenotic <input type="radio"/> Mild <input type="radio"/> Moderate <input type="radio"/> Severe                                   | Mean Gradient:<br>Peak gradient                                 |
|           |                                 | <input type="checkbox"/> Regurgitant <input type="radio"/> Mild <input type="radio"/> Moderate <input type="radio"/> Severe                                |                                                                 |
| Pulmonary | <input type="checkbox"/> Normal | <input type="checkbox"/> Stenotic <sup>Δ</sup> <input type="radio"/> Mild <input type="radio"/> Moderate <input type="radio"/> Severe                      | Mean Gradient:<br>Peak gradient                                 |
|           |                                 | <input type="checkbox"/> Regurgitant <input type="radio"/> Mild <input type="radio"/> Moderate <input type="radio"/> Severe<br><i>Δ kindly fill form L</i> |                                                                 |

**G4**

Specific Advice in the visit (if any) :  Nil  Hospitalization  Change of medication  
 Intervention  Cardiac  Others, specify \_\_\_\_\_

Name of the procedure:

Date :

|   |   |   |   |   |   |   |   |
|---|---|---|---|---|---|---|---|
| D | D | M | M | Y | Y | Y | Y |
|---|---|---|---|---|---|---|---|

**G5**

TNPHDR Risk category (as per triage):  LOW RISK  HIGH RISK

**G6**

Date of next follow up:

|   |   |   |   |   |   |   |   |
|---|---|---|---|---|---|---|---|
| D | D | M | M | Y | Y | Y | Y |
|---|---|---|---|---|---|---|---|

**PERIPARTUM VISIT PAGE**

*(if the patient is registered for the first time during the peripartum period, then kindly fill first visit page also along with this)*

|                          |                                                                                                                                                                                                                                                                                                                                        |   |   |   |   |   |   |   |   |                          |                                                                                                                                                                                                                                                                                                                                        |   |   |   |   |   |   |   |   |
|--------------------------|----------------------------------------------------------------------------------------------------------------------------------------------------------------------------------------------------------------------------------------------------------------------------------------------------------------------------------------|---|---|---|---|---|---|---|---|--------------------------|----------------------------------------------------------------------------------------------------------------------------------------------------------------------------------------------------------------------------------------------------------------------------------------------------------------------------------------|---|---|---|---|---|---|---|---|
| <b>Date of admission</b> | <table border="1" style="width:100%; border-collapse: collapse;"> <tr> <td style="width:20px;">D</td><td style="width:20px;">D</td><td style="width:20px;">M</td><td style="width:20px;">M</td><td style="width:20px;">Y</td><td style="width:20px;">Y</td><td style="width:20px;">Y</td><td style="width:20px;">Y</td> </tr> </table> | D | D | M | M | Y | Y | Y | Y | <b>Date of discharge</b> | <table border="1" style="width:100%; border-collapse: collapse;"> <tr> <td style="width:20px;">D</td><td style="width:20px;">D</td><td style="width:20px;">M</td><td style="width:20px;">M</td><td style="width:20px;">Y</td><td style="width:20px;">Y</td><td style="width:20px;">Y</td><td style="width:20px;">Y</td> </tr> </table> | D | D | M | M | Y | Y | Y | Y |
| D                        | D                                                                                                                                                                                                                                                                                                                                      | M | M | Y | Y | Y | Y |   |   |                          |                                                                                                                                                                                                                                                                                                                                        |   |   |   |   |   |   |   |   |
| D                        | D                                                                                                                                                                                                                                                                                                                                      | M | M | Y | Y | Y | Y |   |   |                          |                                                                                                                                                                                                                                                                                                                                        |   |   |   |   |   |   |   |   |

|                                                                                                                                                    |                          |                          |                          |                          |                          |                          |                          |                          |
|----------------------------------------------------------------------------------------------------------------------------------------------------|--------------------------|--------------------------|--------------------------|--------------------------|--------------------------|--------------------------|--------------------------|--------------------------|
| <b>H1</b>                                                                                                                                          | <b>PATIENT SYMPTOMS</b>  |                          |                          |                          |                          |                          |                          |                          |
| <b>H1.1 NYHA CLASS</b> <input type="radio"/> Class I <input type="radio"/> Class II <input type="radio"/> Class III <input type="radio"/> Class IV |                          |                          |                          |                          |                          |                          |                          |                          |
| Presenting symptoms (tick all applicable)                                                                                                          |                          |                          |                          |                          |                          |                          |                          |                          |
| <b>H1.2</b>                                                                                                                                        | <b>H1.3</b>              | <b>H1.4</b>              | <b>H1.5</b>              | <b>H1.6</b>              | <b>H1.7</b>              | <b>H1.8</b>              | <b>H1.9</b>              |                          |
| Nil                                                                                                                                                | Dyspnea                  | PND                      | Orthopnea                | Palpitation              | Pedal edema              | Chest pain               | Syncope                  |                          |
| <input type="checkbox"/>                                                                                                                           | <input type="checkbox"/> | <input type="checkbox"/> | <input type="checkbox"/> | <input type="checkbox"/> | <input type="checkbox"/> | <input type="checkbox"/> | <input type="checkbox"/> | <input type="checkbox"/> |
| <b>H1.10</b> <input type="checkbox"/> Others _____                                                                                                 |                          |                          |                          |                          |                          |                          |                          |                          |

|                                                                                                                                                                                                                |                                   |  |  |  |  |  |  |  |
|----------------------------------------------------------------------------------------------------------------------------------------------------------------------------------------------------------------|-----------------------------------|--|--|--|--|--|--|--|
| <b>H2</b>                                                                                                                                                                                                      | <b>RISK ASSESSMENT AND TRIAGE</b> |  |  |  |  |  |  |  |
| <b>H2.1 Modified WHO Risk assessment Scale:</b> <input type="radio"/> m WHO I <input type="radio"/> m WHO II <input type="radio"/> m WHO II-III <input type="radio"/> m WHO III <input type="radio"/> m WHO IV |                                   |  |  |  |  |  |  |  |
| <b>H2.2 TNPHDR Risk category (as per triage):</b> <input type="radio"/> LOW RISK <input type="radio"/> HIGH RISK                                                                                               |                                   |  |  |  |  |  |  |  |

|                                                                                                                                                                                                                                                                            |                                 |  |  |                                |  |  |  |                                                                            |  |  |  |
|----------------------------------------------------------------------------------------------------------------------------------------------------------------------------------------------------------------------------------------------------------------------------|---------------------------------|--|--|--------------------------------|--|--|--|----------------------------------------------------------------------------|--|--|--|
| <b>H3</b>                                                                                                                                                                                                                                                                  | <b>CLINICAL SIGNS &amp; ECG</b> |  |  |                                |  |  |  |                                                                            |  |  |  |
| <b>H3.1</b> Ht (cm)                                                                                                                                                                                                                                                        |                                 |  |  | <b>H3.2</b> Wt (Kg)            |  |  |  | <b>H3.3</b> RR (/min)                                                      |  |  |  |
| <b>H3.4</b> HR (/min)                                                                                                                                                                                                                                                      |                                 |  |  | <b>H3.5</b> BP(mm Hg)          |  |  |  | <b>H3.6</b> SPO2 (%)                                                       |  |  |  |
| <b>H3.7</b> CVS: S1 _____ S2 _____                                                                                                                                                                                                                                         |                                 |  |  | <b>H3.8</b> JVP                |  |  |  | <b>H3.9</b> RS <input type="radio"/> Normal <input type="radio"/> Abnormal |  |  |  |
| Murmur: <input type="radio"/> Yes <input type="radio"/> No <input type="checkbox"/> Sys <input type="checkbox"/> Dias                                                                                                                                                      |                                 |  |  | <input type="radio"/> Normal   |  |  |  | <input type="checkbox"/> Crepitations                                      |  |  |  |
| Gallop: <input type="radio"/> Yes <input type="radio"/> No <input type="checkbox"/> LVS3 <input type="checkbox"/> RVS3                                                                                                                                                     |                                 |  |  | <input type="radio"/> Elevated |  |  |  | <input type="checkbox"/> Rhonchi/ Wheeze                                   |  |  |  |
| <b>H3.10</b> ECG <input type="radio"/> Normal <input type="radio"/> Abnormal. If abnormal, Choose:                                                                                                                                                                         |                                 |  |  |                                |  |  |  |                                                                            |  |  |  |
| <input type="checkbox"/> AF <input type="checkbox"/> SVT <input type="checkbox"/> VT <input type="checkbox"/> 1°AVB <input type="checkbox"/> 2° AVB <input type="checkbox"/> CHB <input type="checkbox"/> ST↑ <input type="checkbox"/> ST↓ <input type="checkbox"/> Others |                                 |  |  |                                |  |  |  |                                                                            |  |  |  |
| <b>Others, Specify:</b>                                                                                                                                                                                                                                                    |                                 |  |  |                                |  |  |  |                                                                            |  |  |  |

**H4 ECHOCARDIOGRAPHIC ASSESSMENT**

|                                                                                    |                                                                                           |                                                |                            |                                          |                              |                                                                                               |  |
|------------------------------------------------------------------------------------|-------------------------------------------------------------------------------------------|------------------------------------------------|----------------------------|------------------------------------------|------------------------------|-----------------------------------------------------------------------------------------------|--|
| <b>Ventricular function</b>                                                        |                                                                                           |                                                |                            | <b>Pulmonary pressures</b>               |                              |                                                                                               |  |
| Wall Motion: <input type="radio"/> Normal <input type="radio"/> Global Hypokinesia |                                                                                           |                                                |                            | Tricuspid regurgitation                  |                              | TRPG (mmHg) :                                                                                 |  |
| <input type="radio"/> Regional wall motion abnormalities                           |                                                                                           |                                                |                            | Pulmonary regurgitation                  |                              | Peak PR (mmHg):                                                                               |  |
| LV systolic function                                                               | LVID                                                                                      | Diastole(mm)                                   |                            | <b>Shunt lesion (Nature of shunt)</b>    |                              | <input type="radio"/> L→R <input type="radio"/> R→L<br><input type="radio"/> Bi-directional   |  |
|                                                                                    |                                                                                           | Systole(mm)                                    |                            |                                          |                              |                                                                                               |  |
|                                                                                    | EF%                                                                                       |                                                |                            | <b>Pericardial effusion (if present)</b> |                              | <input type="radio"/> Mild<br><input type="radio"/> Moderate<br><input type="radio"/> Massive |  |
| LV diastolic function                                                              | E(cm/s)                                                                                   |                                                |                            |                                          |                              |                                                                                               |  |
|                                                                                    | A(cm/s)                                                                                   |                                                |                            | <b>Others</b>                            |                              | <input type="checkbox"/> Vegetations <input type="checkbox"/> Thrombus                        |  |
| RV systolic function                                                               | <input type="radio"/> Normal <input type="radio"/> Abnormal<br>TAPSE (mm) _____ Sa' _____ |                                                |                            |                                          |                              |                                                                                               |  |
| <b>Valve function ( if prosthetic valve kindly fill form I )</b>                   |                                                                                           |                                                |                            |                                          |                              |                                                                                               |  |
| Mitral                                                                             | <input type="checkbox"/> Normal                                                           | <input type="checkbox"/> Stenotic              | <input type="radio"/> Mild | <input type="radio"/> Moderate           | <input type="radio"/> Severe | MVOA: _____ cm <sup>2</sup>                                                                   |  |
|                                                                                    |                                                                                           | <input type="checkbox"/> Regurgitant           | <input type="radio"/> Mild | <input type="radio"/> Moderate           | <input type="radio"/> Severe |                                                                                               |  |
| Aortic                                                                             | <input type="checkbox"/> Normal                                                           | <input type="checkbox"/> Stenotic <sup>Δ</sup> | <input type="radio"/> Mild | <input type="radio"/> Moderate           | <input type="radio"/> Severe | Mean Gradient:                                                                                |  |
|                                                                                    |                                                                                           | <input type="checkbox"/> Regurgitant           | <input type="radio"/> Mild | <input type="radio"/> Moderate           | <input type="radio"/> Severe |                                                                                               |  |
|                                                                                    |                                                                                           | <sup>Δ</sup> kindly fill form L                |                            |                                          |                              |                                                                                               |  |
| Tricuspid                                                                          | <input type="checkbox"/> Normal                                                           | <input type="checkbox"/> Stenotic              | <input type="radio"/> Mild | <input type="radio"/> Moderate           | <input type="radio"/> Severe | Mean Gradient:                                                                                |  |
|                                                                                    |                                                                                           | <input type="checkbox"/> Regurgitant           | <input type="radio"/> Mild | <input type="radio"/> Moderate           | <input type="radio"/> Severe |                                                                                               |  |
|                                                                                    |                                                                                           | Peak gradient                                  |                            |                                          |                              |                                                                                               |  |
| Pulmonary                                                                          | <input type="checkbox"/> Normal                                                           | <input type="checkbox"/> Stenotic <sup>Δ</sup> | <input type="radio"/> Mild | <input type="radio"/> Moderate           | <input type="radio"/> Severe | Mean Gradient:                                                                                |  |
|                                                                                    |                                                                                           | <input type="checkbox"/> Regurgitant           | <input type="radio"/> Mild | <input type="radio"/> Moderate           | <input type="radio"/> Severe |                                                                                               |  |
|                                                                                    |                                                                                           | <sup>Δ</sup> kindly fill form L                |                            |                                          |                              |                                                                                               |  |

|                                                                                                                                                                                           |                                                                                                                                                                |                          |                                      |                          |                                                                                                                                                                |                                                                                                                       |                                                   |                           |                                                                 |                       |                       |   |   |   |   |                                                                                                                                  |   |  |   |   |   |   |   |
|-------------------------------------------------------------------------------------------------------------------------------------------------------------------------------------------|----------------------------------------------------------------------------------------------------------------------------------------------------------------|--------------------------|--------------------------------------|--------------------------|----------------------------------------------------------------------------------------------------------------------------------------------------------------|-----------------------------------------------------------------------------------------------------------------------|---------------------------------------------------|---------------------------|-----------------------------------------------------------------|-----------------------|-----------------------|---|---|---|---|----------------------------------------------------------------------------------------------------------------------------------|---|--|---|---|---|---|---|
| <b>H5</b>                                                                                                                                                                                 | <b>PERIPARTUM DETAILS(tick applicable)</b>                                                                                                                     |                          |                                      |                          |                                                                                                                                                                |                                                                                                                       |                                                   |                           |                                                                 |                       |                       |   |   |   |   |                                                                                                                                  |   |  |   |   |   |   |   |
|                                                                                                                                                                                           | H5.1 Date of delivery                                                                                                                                          |                          |                                      |                          |                                                                                                                                                                |                                                                                                                       |                                                   | Time of Delivery:         |                                                                 |                       |                       |   |   |   |   |                                                                                                                                  |   |  |   |   |   |   |   |
|                                                                                                                                                                                           | <table border="1" style="width:100%; text-align:center;"> <tr> <td>D</td><td>D</td><td>M</td><td>M</td><td>Y</td><td>Y</td><td>Y</td><td>Y</td> </tr> </table> |                          |                                      |                          |                                                                                                                                                                |                                                                                                                       |                                                   | D                         | D                                                               | M                     | M                     | Y | Y | Y | Y | <table border="1" style="width:100%; text-align:center;"> <tr> <td>H</td><td>H</td><td>:</td><td>M</td><td>M</td> </tr> </table> |   |  | H | H | : | M | M |
|                                                                                                                                                                                           | D                                                                                                                                                              | D                        | M                                    | M                        | Y                                                                                                                                                              | Y                                                                                                                     | Y                                                 | Y                         |                                                                 |                       |                       |   |   |   |   |                                                                                                                                  |   |  |   |   |   |   |   |
|                                                                                                                                                                                           | H                                                                                                                                                              | H                        | :                                    | M                        | M                                                                                                                                                              |                                                                                                                       |                                                   |                           |                                                                 |                       |                       |   |   |   |   |                                                                                                                                  |   |  |   |   |   |   |   |
|                                                                                                                                                                                           |                                                                                                                                                                |                          |                                      |                          |                                                                                                                                                                |                                                                                                                       | <input type="radio"/> AM <input type="radio"/> PM |                           |                                                                 |                       |                       |   |   |   |   |                                                                                                                                  |   |  |   |   |   |   |   |
| H5.2 Mode of delivery                                                                                                                                                                     |                                                                                                                                                                | Vaginal                  | Assisted vaginal                     | LSCS                     |                                                                                                                                                                | H5.3 Type of Anaesthesia                                                                                              |                                                   |                           |                                                                 |                       |                       |   |   |   |   |                                                                                                                                  |   |  |   |   |   |   |   |
|                                                                                                                                                                                           |                                                                                                                                                                | <input type="radio"/>    | <input type="radio"/>                | Emergency                | Elective                                                                                                                                                       | <input type="radio"/> Spinal <input type="radio"/> Epi Spinal <input type="radio"/> Epidural <input type="radio"/> GA |                                                   |                           |                                                                 |                       |                       |   |   |   |   |                                                                                                                                  |   |  |   |   |   |   |   |
| H5.4 Induction of labour done: <input type="radio"/> Yes <input type="radio"/> No   Reason for induction: _____                                                                           |                                                                                                                                                                |                          |                                      |                          |                                                                                                                                                                |                                                                                                                       |                                                   |                           |                                                                 |                       |                       |   |   |   |   |                                                                                                                                  |   |  |   |   |   |   |   |
| H5.5 Indication for LSCS: <input type="checkbox"/> Obstetric _____<br><input type="checkbox"/> Cardiac _____                                                                              |                                                                                                                                                                |                          |                                      |                          |                                                                                                                                                                |                                                                                                                       |                                                   |                           |                                                                 |                       |                       |   |   |   |   |                                                                                                                                  |   |  |   |   |   |   |   |
| <b>H6</b>                                                                                                                                                                                 | <b>MATERNAL OUTCOME (tick all applicable)</b>                                                                                                                  |                          |                                      |                          |                                                                                                                                                                |                                                                                                                       |                                                   |                           |                                                                 |                       |                       |   |   |   |   |                                                                                                                                  |   |  |   |   |   |   |   |
|                                                                                                                                                                                           | <b>CARDIOVASCULAR OUTCOME</b>                                                                                                                                  |                          |                                      |                          |                                                                                                                                                                |                                                                                                                       |                                                   |                           |                                                                 |                       |                       |   |   |   |   |                                                                                                                                  |   |  |   |   |   |   |   |
|                                                                                                                                                                                           | H6.1 Heart failure                                                                                                                                             |                          | H6.2                                 |                          | H6.3                                                                                                                                                           | H6.4                                                                                                                  | H6.5                                              |                           | H6.6                                                            | H6.7                  |                       |   |   |   |   |                                                                                                                                  |   |  |   |   |   |   |   |
|                                                                                                                                                                                           | Pulmonary edema                                                                                                                                                | CHF                      | Cardiogenic shock                    | Pulmonary Embolism       | CVA                                                                                                                                                            | Other thrombotic manifestations                                                                                       |                                                   | Bleeding manifestations   | Arrhythmia                                                      |                       |                       |   |   |   |   |                                                                                                                                  |   |  |   |   |   |   |   |
|                                                                                                                                                                                           | <input type="checkbox"/>                                                                                                                                       | <input type="checkbox"/> | <input type="checkbox"/>             | <input type="checkbox"/> | <input type="checkbox"/>                                                                                                                                       | <input type="checkbox"/>                                                                                              |                                                   | <input type="checkbox"/>  | <input type="checkbox"/>                                        |                       |                       |   |   |   |   |                                                                                                                                  |   |  |   |   |   |   |   |
|                                                                                                                                                                                           | H6.8 <input type="checkbox"/> Others _____                                                                                                                     |                          |                                      |                          |                                                                                                                                                                |                                                                                                                       |                                                   |                           |                                                                 |                       |                       |   |   |   |   |                                                                                                                                  |   |  |   |   |   |   |   |
|                                                                                                                                                                                           | <b>OBSTETRIC OUTCOME</b>                                                                                                                                       |                          |                                      |                          |                                                                                                                                                                |                                                                                                                       |                                                   |                           |                                                                 |                       |                       |   |   |   |   |                                                                                                                                  |   |  |   |   |   |   |   |
|                                                                                                                                                                                           | H6.9 PIH                                                                                                                                                       |                          | H6.10 Pre- eclampsia                 |                          | H6.11 Eclampsia                                                                                                                                                |                                                                                                                       | H6.12 PPH                                         | H6.13 HELLP               | H6.14 CVT                                                       |                       |                       |   |   |   |   |                                                                                                                                  |   |  |   |   |   |   |   |
| <input type="checkbox"/>                                                                                                                                                                  |                                                                                                                                                                | <input type="checkbox"/> |                                      | <input type="checkbox"/> |                                                                                                                                                                | <input type="checkbox"/>                                                                                              | <input type="checkbox"/>                          | <input type="checkbox"/>  |                                                                 |                       |                       |   |   |   |   |                                                                                                                                  |   |  |   |   |   |   |   |
| H6.15 <input type="checkbox"/> Others _____                                                                                                                                               |                                                                                                                                                                |                          |                                      |                          |                                                                                                                                                                |                                                                                                                       |                                                   |                           |                                                                 |                       |                       |   |   |   |   |                                                                                                                                  |   |  |   |   |   |   |   |
| H6.16 Final outcome                                                                                                                                                                       |                                                                                                                                                                |                          | <input type="radio"/> Death(details) |                          |                                                                                                                                                                | <input type="radio"/> Discharge(details)                                                                              |                                                   |                           |                                                                 |                       |                       |   |   |   |   |                                                                                                                                  |   |  |   |   |   |   |   |
| <b>H7</b>                                                                                                                                                                                 | <b>FETAL OUTCOME (tick applicable)</b>                                                                                                                         |                          |                                      |                          |                                                                                                                                                                |                                                                                                                       |                                                   |                           |                                                                 |                       |                       |   |   |   |   |                                                                                                                                  |   |  |   |   |   |   |   |
|                                                                                                                                                                                           | H7.1 Live Birth                                                                                                                                                |                          | H7.2 Still born                      |                          | H7.3 IUD                                                                                                                                                       |                                                                                                                       | H7.4 IUGR                                         |                           | H7.5 Abortion                                                   |                       |                       |   |   |   |   |                                                                                                                                  |   |  |   |   |   |   |   |
|                                                                                                                                                                                           | <input type="radio"/>                                                                                                                                          |                          | <input type="radio"/>                |                          | <input type="radio"/>                                                                                                                                          |                                                                                                                       | <input type="radio"/>                             |                           | <input type="radio"/> Spontaneous <input type="radio"/> Induced |                       |                       |   |   |   |   |                                                                                                                                  |   |  |   |   |   |   |   |
|                                                                                                                                                                                           | H7.6 If Live Birth:                                                                                                                                            |                          |                                      | H7.7 Birth Weight Kgs    |                                                                                                                                                                | >4 kg                                                                                                                 |                                                   | Large for gestational age |                                                                 | <input type="radio"/> |                       |   |   |   |   |                                                                                                                                  |   |  |   |   |   |   |   |
|                                                                                                                                                                                           | Term                                                                                                                                                           |                          | 2.5-4 kg                             |                          | Appropriate for gestational age                                                                                                                                |                                                                                                                       |                                                   |                           | <input type="radio"/>                                           |                       |                       |   |   |   |   |                                                                                                                                  |   |  |   |   |   |   |   |
|                                                                                                                                                                                           | Pre-term                                                                                                                                                       |                          | 1.5-2.5 kg                           |                          | Low birth weight                                                                                                                                               |                                                                                                                       |                                                   |                           | <input type="radio"/>                                           |                       |                       |   |   |   |   |                                                                                                                                  |   |  |   |   |   |   |   |
| G7.8 APGAR score <input type="checkbox"/>                                                                                                                                                 |                                                                                                                                                                |                          | <1.5 kg                              |                          | Very low birth weight                                                                                                                                          |                                                                                                                       |                                                   |                           | <input type="radio"/>                                           |                       |                       |   |   |   |   |                                                                                                                                  |   |  |   |   |   |   |   |
| <b>H8</b>                                                                                                                                                                                 | <b>NEONATAL OUTCOME</b>                                                                                                                                        |                          |                                      |                          |                                                                                                                                                                |                                                                                                                       |                                                   |                           |                                                                 |                       |                       |   |   |   |   |                                                                                                                                  |   |  |   |   |   |   |   |
|                                                                                                                                                                                           | H8.1 Neonatal death                                                                                                                                            |                          | H8.2 Congenital anomalies            |                          | H8.3 Embryopathy                                                                                                                                               |                                                                                                                       | H8.4 Heart disease                                |                           | H8.5 Others _____                                               |                       |                       |   |   |   |   |                                                                                                                                  |   |  |   |   |   |   |   |
|                                                                                                                                                                                           | <input type="checkbox"/>                                                                                                                                       |                          | <input type="checkbox"/>             |                          | <input type="checkbox"/>                                                                                                                                       |                                                                                                                       | <input type="checkbox"/>                          |                           | <input type="checkbox"/>                                        |                       |                       |   |   |   |   |                                                                                                                                  |   |  |   |   |   |   |   |
| <b>H9</b>                                                                                                                                                                                 | <b>DISCHARGE DETAILS</b>                                                                                                                                       |                          |                                      |                          |                                                                                                                                                                |                                                                                                                       |                                                   |                           |                                                                 |                       |                       |   |   |   |   |                                                                                                                                  |   |  |   |   |   |   |   |
|                                                                                                                                                                                           | H9.1 Functional Class at discharge (tick applicable)                                                                                                           |                          |                                      |                          | Class I                                                                                                                                                        |                                                                                                                       | Class II                                          |                           | Class III                                                       |                       | Class IV              |   |   |   |   |                                                                                                                                  |   |  |   |   |   |   |   |
|                                                                                                                                                                                           |                                                                                                                                                                |                          |                                      |                          | <input type="radio"/>                                                                                                                                          |                                                                                                                       | <input type="radio"/>                             |                           | <input type="radio"/>                                           |                       | <input type="radio"/> |   |   |   |   |                                                                                                                                  |   |  |   |   |   |   |   |
|                                                                                                                                                                                           | Disability at the time of discharge                                                                                                                            |                          |                                      |                          | <input type="radio"/> Yes <input type="radio"/> No                                                                                                             |                                                                                                                       | Details _____                                     |                           |                                                                 |                       |                       |   |   |   |   |                                                                                                                                  |   |  |   |   |   |   |   |
| H9.2 Mode of Contraception:                                                                                                                                                               |                                                                                                                                                                |                          |                                      |                          | H9.3 Follow up date:                                                                                                                                           |                                                                                                                       |                                                   |                           |                                                                 |                       |                       |   |   |   |   |                                                                                                                                  |   |  |   |   |   |   |   |
| <input type="radio"/> Nil <input type="radio"/> IUCD <input type="radio"/> OCP <input type="radio"/> Barrier method<br><input type="radio"/> Tubectomy <input type="radio"/> Others _____ |                                                                                                                                                                |                          |                                      |                          | <table border="1" style="width:100%; text-align:center;"> <tr> <td>D</td><td>D</td><td>M</td><td>M</td><td>Y</td><td>Y</td><td>Y</td><td>Y</td> </tr> </table> |                                                                                                                       |                                                   |                           |                                                                 | D                     | D                     | M | M | Y | Y | Y                                                                                                                                | Y |  |   |   |   |   |   |
| D                                                                                                                                                                                         | D                                                                                                                                                              | M                        | M                                    | Y                        | Y                                                                                                                                                              | Y                                                                                                                     | Y                                                 |                           |                                                                 |                       |                       |   |   |   |   |                                                                                                                                  |   |  |   |   |   |   |   |
| <b>H10</b>                                                                                                                                                                                | Any other relevant information/ remarks:                                                                                                                       |                          |                                      |                          |                                                                                                                                                                |                                                                                                                       |                                                   |                           |                                                                 |                       |                       |   |   |   |   |                                                                                                                                  |   |  |   |   |   |   |   |
|                                                                                                                                                                                           |                                                                                                                                                                |                          |                                      |                          |                                                                                                                                                                |                                                                                                                       |                                                   |                           |                                                                 |                       |                       |   |   |   |   |                                                                                                                                  |   |  |   |   |   |   |   |

**SPECIFIC DISEASE PROFORMA**

**I. PROSTHETIC VALVE (FORM I)**

**I1** Pre-Valve replacement Interventions (if any):  BMV  CMC  OTHERS

**I2** Pre-operative Diagnosis:  
 Etiological diagnosis:  RHD  CHD  DEGENERATIVE  BICAV  OTHERS \_\_\_\_\_  
 Pathological diagnosis:  MR  MS  AR  AS  Others /Associated lesions \_\_\_\_\_

**I3** Baseline prosthetic valve details

**I3.1** Date of valve replacement: \_\_\_\_\_

**I3.2** Done in institution: \_\_\_\_\_

| <b>I3.3</b><br>Valve replaced<br>(tick the relevant) | <b>I3.4</b><br>Valve size(mm) | <b>I3.5</b> Post op<br>gradient<br>(mmHg) | <b>I3.6</b> Type of valve (tick the relevant) |                        |                       |                       | <b>I3.7</b><br>Post op<br>OAC | <b>I3.8</b><br>Post op<br>INR | <b>I3.9</b><br>Post op<br>Aspirin |
|------------------------------------------------------|-------------------------------|-------------------------------------------|-----------------------------------------------|------------------------|-----------------------|-----------------------|-------------------------------|-------------------------------|-----------------------------------|
|                                                      |                               |                                           | Bio<br>prosthetic                             | Single<br>tilting disc | Bi- leaflet           | Others<br>Specify     |                               |                               |                                   |
| Mitral <input type="checkbox"/>                      |                               |                                           | <input type="radio"/>                         | <input type="radio"/>  | <input type="radio"/> | <input type="radio"/> | Warfarin                      | <input type="radio"/> Yes     |                                   |
| Aortic <input type="checkbox"/>                      |                               |                                           | <input type="radio"/>                         | <input type="radio"/>  | <input type="radio"/> | <input type="radio"/> | <input type="radio"/>         |                               |                                   |
| Tricuspid <input type="checkbox"/>                   |                               |                                           | <input type="radio"/>                         | <input type="radio"/>  | <input type="radio"/> | <input type="radio"/> | Acitrom                       |                               |                                   |
| Pulmonary <input type="checkbox"/>                   |                               |                                           | <input type="radio"/>                         | <input type="radio"/>  | <input type="radio"/> | <input type="radio"/> | <input type="radio"/>         | <input type="radio"/> No      |                                   |

**I4** Pre-pregnancy complications (if any):

|                          |            |     |        |        |                                                                      |
|--------------------------|------------|-----|--------|--------|----------------------------------------------------------------------|
| Bleeding                 | Thrombotic |     |        | Others | INR during Complication _____<br>Anti-coag during Complication _____ |
| <input type="checkbox"/> | PVT        | CVA | Others |        |                                                                      |

**I5** ANTICOAGULANT THERAPY (Please see back page)

**I6** ECHOCARDIOGRAPHIC ASSESSMENT- F/U

|                                                | 1 <sup>st</sup> Tri                                   |                                                       | 2 <sup>nd</sup> Tri                                   |                                                       | 3 <sup>rd</sup> Tri                                   |                                                       | Peripartum                                            |                                                       | PN                                                    |                                                       |
|------------------------------------------------|-------------------------------------------------------|-------------------------------------------------------|-------------------------------------------------------|-------------------------------------------------------|-------------------------------------------------------|-------------------------------------------------------|-------------------------------------------------------|-------------------------------------------------------|-------------------------------------------------------|-------------------------------------------------------|
|                                                | Mitral                                                | Aortic                                                | Mitral                                                | Aortic                                                | Mitral                                                | Aortic                                                | Mitral                                                | Aortic                                                | Mitral                                                | Aortic                                                |
| Peak gradient (mmHg)                           |                                                       |                                                       |                                                       |                                                       |                                                       |                                                       |                                                       |                                                       |                                                       |                                                       |
| Peak velocity(m/s)                             |                                                       |                                                       |                                                       |                                                       |                                                       |                                                       |                                                       |                                                       |                                                       |                                                       |
| Mean gradient (mmHg)                           |                                                       |                                                       |                                                       |                                                       |                                                       |                                                       |                                                       |                                                       |                                                       |                                                       |
| Mean velocity(m/s)                             |                                                       |                                                       |                                                       |                                                       |                                                       |                                                       |                                                       |                                                       |                                                       |                                                       |
| VTI <sub>(prox)</sub> /VTI <sub>(distal)</sub> |                                                       |                                                       |                                                       |                                                       |                                                       |                                                       |                                                       |                                                       |                                                       |                                                       |
| EOA(cm <sup>2</sup> )                          |                                                       |                                                       |                                                       |                                                       |                                                       |                                                       |                                                       |                                                       |                                                       |                                                       |
| PHT(ms)/ Aortic AT(ms)                         |                                                       |                                                       |                                                       |                                                       |                                                       |                                                       |                                                       |                                                       |                                                       |                                                       |
| Normal 2D movement of the Prosthetic valve     | <input type="radio"/> Yes<br><input type="radio"/> No | <input type="radio"/> Yes<br><input type="radio"/> No | <input type="radio"/> Yes<br><input type="radio"/> No | <input type="radio"/> Yes<br><input type="radio"/> No | <input type="radio"/> Yes<br><input type="radio"/> No | <input type="radio"/> Yes<br><input type="radio"/> No | <input type="radio"/> Yes<br><input type="radio"/> No | <input type="radio"/> Yes<br><input type="radio"/> No | <input type="radio"/> Yes<br><input type="radio"/> No | <input type="radio"/> Yes<br><input type="radio"/> No |
| Any thrombus visible                           | <input type="radio"/> Yes<br><input type="radio"/> No | <input type="radio"/> Yes<br><input type="radio"/> No | <input type="radio"/> Yes<br><input type="radio"/> No | <input type="radio"/> Yes<br><input type="radio"/> No | <input type="radio"/> Yes<br><input type="radio"/> No | <input type="radio"/> Yes<br><input type="radio"/> No | <input type="radio"/> Yes<br><input type="radio"/> No | <input type="radio"/> Yes<br><input type="radio"/> No | <input type="radio"/> Yes<br><input type="radio"/> No | <input type="radio"/> Yes<br><input type="radio"/> No |

**I7** Present Pregnancy Complications- Admitted  No  Yes. Duration of hospitalization \_\_\_\_\_

|                                                                                                              |                          |                             |                                                                                                              |                          |                          |                          |                          |                                                                                                                                                                                                                                                              |  |  |
|--------------------------------------------------------------------------------------------------------------|--------------------------|-----------------------------|--------------------------------------------------------------------------------------------------------------|--------------------------|--------------------------|--------------------------|--------------------------|--------------------------------------------------------------------------------------------------------------------------------------------------------------------------------------------------------------------------------------------------------------|--|--|
| <b>Prosthetic Valve Thrombosis</b>                                                                           |                          |                             | <b>Bleeding Complication</b>                                                                                 |                          |                          |                          |                          | <b>Other complications</b>                                                                                                                                                                                                                                   |  |  |
| PVT <input type="radio"/> Yes <input type="radio"/> No                                                       |                          |                             | Bleeding: <input type="radio"/> Yes <input type="radio"/> No                                                 |                          |                          |                          |                          | <input type="checkbox"/> Other thrombotic complications<br><input type="checkbox"/> Acute Pulmonary Edema<br><input type="checkbox"/> Cardiogenic Shock<br><input type="checkbox"/> Infective Endocarditis<br><input type="checkbox"/> Others, Specify _____ |  |  |
| Time of PVT                                                                                                  | <input type="radio"/> AN | Gestational age (in Weeks): | Major                                                                                                        | IC Bleed                 | Retroperitoneal          | GIB                      | Others                   |                                                                                                                                                                                                                                                              |  |  |
|                                                                                                              | <input type="radio"/> PN | Postnatal day:              |                                                                                                              | <input type="checkbox"/> | <input type="checkbox"/> | <input type="checkbox"/> | <input type="checkbox"/> |                                                                                                                                                                                                                                                              |  |  |
| Lysis done with: <input type="radio"/> Nil <input type="radio"/> SK <input type="radio"/> TNK                |                          |                             | Minor                                                                                                        | Sub Cut                  | Gum bleed                | Epistaxis                | Others                   |                                                                                                                                                                                                                                                              |  |  |
| Outcome of Lysis : <input type="radio"/> Success <input type="radio"/> Failure                               |                          |                             |                                                                                                              | <input type="checkbox"/> | <input type="checkbox"/> | <input type="checkbox"/> | <input type="checkbox"/> |                                                                                                                                                                                                                                                              |  |  |
| Anti-coagulant at the time of PVT                                                                            |                          |                             | Anti-coagulant at the time of Bleed                                                                          |                          |                          |                          |                          |                                                                                                                                                                                                                                                              |  |  |
| <input type="radio"/> OAC <input type="radio"/> Heparin <input type="radio"/> UFH <input type="radio"/> LMWH |                          |                             | <input type="radio"/> OAC <input type="radio"/> Heparin <input type="radio"/> UFH <input type="radio"/> LMWH |                          |                          |                          |                          |                                                                                                                                                                                                                                                              |  |  |
| INR/APTT at time of PVT _____                                                                                |                          |                             | INR/APTT at time of Bleed _____                                                                              |                          |                          |                          |                          |                                                                                                                                                                                                                                                              |  |  |

**I8** Any other relevant information/ remarks:





| K. CARDIAC FAILURE (FORM K)                      |                                                                                                                                                                      |                                                                                                                                                |                          |                          |                          |                                                                                                                                                         |                          |                          |                          |                          |
|--------------------------------------------------|----------------------------------------------------------------------------------------------------------------------------------------------------------------------|------------------------------------------------------------------------------------------------------------------------------------------------|--------------------------|--------------------------|--------------------------|---------------------------------------------------------------------------------------------------------------------------------------------------------|--------------------------|--------------------------|--------------------------|--------------------------|
| K1                                               | Etiology of Cardiac failure ( <i>tick the relevant</i> )                                                                                                             |                                                                                                                                                |                          |                          |                          |                                                                                                                                                         |                          |                          |                          |                          |
|                                                  | K1.1<br>PPCMP                                                                                                                                                        | K1.2<br>DCMP                                                                                                                                   | K1.3<br>IHD              | K1.4<br>VHD              | K1.5<br>HCMP             | K1.6<br>RCMP                                                                                                                                            | K1.7<br>MYOCARDITIS      | K1.8<br>CHD              | K1.9<br>ARF              | K1.10<br>NON-COMPACTION  |
|                                                  | <input type="checkbox"/>                                                                                                                                             | <input type="checkbox"/>                                                                                                                       | <input type="checkbox"/> | <input type="checkbox"/> | <input type="checkbox"/> | <input type="checkbox"/>                                                                                                                                | <input type="checkbox"/> | <input type="checkbox"/> | <input type="checkbox"/> | <input type="checkbox"/> |
| K1.11 <input type="checkbox"/> Others (Specify): |                                                                                                                                                                      |                                                                                                                                                |                          |                          |                          |                                                                                                                                                         |                          |                          |                          |                          |
| K2                                               | Pre-pregnancy decompensation: <input type="radio"/> Yes    No <input type="radio"/>                                                                                  |                                                                                                                                                |                          |                          |                          |                                                                                                                                                         |                          |                          |                          |                          |
| K3                                               | Cardiac decompensation: <input type="checkbox"/> Heart failure<br><input type="checkbox"/> Acute pulmonary edema<br><input type="checkbox"/> Cardiogenic shock       |                                                                                                                                                |                          |                          |                          | Treatment given: <input type="checkbox"/> Hospitalization<br><input type="checkbox"/> Inotropic support<br><input type="checkbox"/> Ventilatory support |                          |                          |                          |                          |
| K4                                               | Clinical symptoms and signs during present pregnancy                                                                                                                 |                                                                                                                                                |                          |                          |                          |                                                                                                                                                         |                          |                          |                          |                          |
|                                                  | K4.1<br>Fatigue/ Effort int                                                                                                                                          | K4.2<br>Ascites                                                                                                                                | K4.3<br>Pleural effusion | K4.4<br>Hepatomegaly     | K4.5<br>Cardiomegaly     | K4.6<br>Other                                                                                                                                           |                          |                          |                          |                          |
|                                                  | <input type="checkbox"/>                                                                                                                                             | <input type="checkbox"/>                                                                                                                       | <input type="checkbox"/> | <input type="checkbox"/> | <input type="checkbox"/> | <input type="checkbox"/>                                                                                                                                |                          |                          |                          |                          |
| K5                                               | PERIPARTUM CARDIOMYOPATHY                                                                                                                                            |                                                                                                                                                |                          |                          |                          |                                                                                                                                                         |                          |                          |                          |                          |
|                                                  | Prior diagnosis of PPCMP ( <i>If multigravida</i> ) <input type="radio"/> Yes <input type="radio"/> No    EF during diagnosis:    EF before present pregnancy:       |                                                                                                                                                |                          |                          |                          |                                                                                                                                                         |                          |                          |                          |                          |
|                                                  | Present pregnancy                                                                                                                                                    | Symptoms at presentation:<br>Day when symptoms first noted: <input type="radio"/> AN (Gest. Age _____ wks) <input type="radio"/> PN: _____ day |                          |                          |                          |                                                                                                                                                         |                          |                          |                          |                          |
|                                                  | Antecedent history: <input type="checkbox"/> Fever <input type="checkbox"/> Obesity <input type="checkbox"/> Family history <input type="checkbox"/> Substance abuse |                                                                                                                                                |                          |                          |                          |                                                                                                                                                         |                          |                          |                          |                          |
|                                                  | Treatment given:                                                                                                                                                     |                                                                                                                                                |                          |                          |                          |                                                                                                                                                         |                          |                          |                          |                          |
| K6                                               | Any other relevant information/ remarks:                                                                                                                             |                                                                                                                                                |                          |                          |                          |                                                                                                                                                         |                          |                          |                          |                          |

| L. OUTFLOW TRACT OBSTRUCTIONS (FORM L) |                                                                                                                                                                                              |                          |                               |                                                           |                          |                          |
|----------------------------------------|----------------------------------------------------------------------------------------------------------------------------------------------------------------------------------------------|--------------------------|-------------------------------|-----------------------------------------------------------|--------------------------|--------------------------|
| L1                                     | AORTOPATHY AND LVOTO ( <i>tick the relevant</i> )                                                                                                                                            |                          |                               |                                                           |                          |                          |
|                                        | L1.1 Marfan                                                                                                                                                                                  | L1.2 BICAV               | L1.3 Other Familial Syndromes | L1.4 Aortic Dissection                                    | L1.5 Others              |                          |
|                                        | <input type="checkbox"/>                                                                                                                                                                     | <input type="checkbox"/> | <input type="checkbox"/>      | <input type="radio"/> Type A <input type="radio"/> Type B | <input type="checkbox"/> |                          |
| L2                                     | Clinical symptoms and signs during present pregnancy                                                                                                                                         |                          |                               |                                                           |                          |                          |
|                                        | L2.1 Fatigue/ Effort int                                                                                                                                                                     | L2.2 Ascites             | L2.3 Pleural effusion         | L2.4 Hepatomegaly                                         | L2.5 Cardiomegaly        | L2.6 Others              |
|                                        | <input type="checkbox"/>                                                                                                                                                                     | <input type="checkbox"/> | <input type="checkbox"/>      | <input type="checkbox"/>                                  | <input type="checkbox"/> | <input type="checkbox"/> |
| L3                                     | Echocardiographic assessment                                                                                                                                                                 |                          |                               |                                                           |                          |                          |
|                                        | LVOT OBSTRUCTION                                                                                                                                                                             |                          |                               |                                                           |                          |                          |
|                                        | Aortic valve morphology <input type="radio"/> Tricuspid <input type="radio"/> Bicuspid <input type="radio"/> Quadricuspid <input type="radio"/> Others                                       |                          |                               |                                                           |                          |                          |
|                                        | Site of LVOT Obstruction <input type="checkbox"/> Valvar <input type="checkbox"/> Supra Valvar <input type="checkbox"/> Sub Valvar <input type="radio"/> Fixed <input type="radio"/> Dynamic |                          |                               |                                                           |                          |                          |
|                                        | PARAMETERS                                                                                                                                                                                   |                          | 1 <sup>ST</sup> TRI           | 2 <sup>ND</sup> TRI                                       | 3 <sup>RD</sup> TRI      | PERIPARTUM    PN         |
|                                        | Aortic dimensions in mm                                                                                                                                                                      | Annulus                  |                               |                                                           |                          |                          |
|                                        |                                                                                                                                                                                              | Sinus                    |                               |                                                           |                          |                          |
|                                        |                                                                                                                                                                                              | STJ                      |                               |                                                           |                          |                          |
|                                        |                                                                                                                                                                                              | Asc. Aorta               |                               |                                                           |                          |                          |
|                                        |                                                                                                                                                                                              | Arch                     |                               |                                                           |                          |                          |
|                                        | Desc thoracic aorta                                                                                                                                                                          |                          |                               |                                                           |                          |                          |
|                                        | AORTIC STENOSIS                                                                                                                                                                              |                          |                               |                                                           |                          |                          |
|                                        | Gradient in mm of Hg                                                                                                                                                                         | Mean                     |                               |                                                           |                          |                          |
|                                        |                                                                                                                                                                                              | Peak                     |                               |                                                           |                          |                          |
|                                        | Velocity in m/sec                                                                                                                                                                            | Mean                     |                               |                                                           |                          |                          |
|                                        |                                                                                                                                                                                              | Peak                     |                               |                                                           |                          |                          |
|                                        | RVOT Obstruction    Pulmonary valve morphology : <input type="checkbox"/> Valvar <input type="checkbox"/> Supra Valvar <input type="checkbox"/> Sub Valvar                                   |                          |                               |                                                           |                          |                          |
|                                        | Gradient                                                                                                                                                                                     | Mean                     |                               |                                                           |                          |                          |
|                                        |                                                                                                                                                                                              | Peak                     |                               |                                                           |                          |                          |
|                                        | Velocity                                                                                                                                                                                     | Mean                     |                               |                                                           |                          |                          |
|                                        |                                                                                                                                                                                              | Peak                     |                               |                                                           |                          |                          |
| L4                                     | Any other relevant information/ remarks:                                                                                                                                                     |                          |                               |                                                           |                          |                          |



**FOLLOW UP VISIT PAGE-I**

Date

|   |   |   |   |   |   |   |   |
|---|---|---|---|---|---|---|---|
| D | D | M | M | Y | Y | Y | Y |
|---|---|---|---|---|---|---|---|

**M1 PATIENT SYMPTOMS**

**M1.1 NYHA CLASS**  Class I  Class II  Class III  Class IV

Presenting symptoms (tick all applicable)

|                          |                          |                          |                          |                            |                            |                           |                          |
|--------------------------|--------------------------|--------------------------|--------------------------|----------------------------|----------------------------|---------------------------|--------------------------|
| <b>M1.2</b><br>Nil       | <b>M1.3</b><br>Dyspnea   | <b>M1.4</b><br>PND       | <b>M1.5</b><br>Orthopnea | <b>M1.6</b><br>Palpitation | <b>M1.7</b><br>Pedal edema | <b>M1.8</b><br>Chest pain | <b>M1.9</b><br>Syncope   |
| <input type="checkbox"/> | <input type="checkbox"/> | <input type="checkbox"/> | <input type="checkbox"/> | <input type="checkbox"/>   | <input type="checkbox"/>   | <input type="checkbox"/>  | <input type="checkbox"/> |

**M1.10**  **Others (Specify):**

**M2 CLINICAL SIGNS & ECG**

|                       |                       |                       |
|-----------------------|-----------------------|-----------------------|
| <b>M2.1</b> Ht (cm)   | <b>M2.2</b> Wt (Kg)   | <b>M2.3</b> RR (/min) |
| <b>M2.4</b> HR (/min) | <b>M2.5</b> BP(mm Hg) | <b>M2.6</b> SPO2 (%)  |

**M2.7** CVS: S1 \_\_\_\_\_ S2 \_\_\_\_\_  
 Murmur:  Yes  No  Sys  Dias  Normal  
 Gallop:  Yes  No  LVS3  RVS3  Elevated

**M2.8** JVP  Normal  Abnormal  
 Crepitations  
 Rhonchi/ Wheeze

**M2.9** RS  Normal  Abnormal

**M2.10** ECG  Normal  Abnormal. If abnormal, Choose:  
 AF  SVT  VT  1°AVB  2° AVB  CHB  ST↑  ST↓  Others  
**Others, Specify:**

**M3 ECHOCARDIOGRAPHIC ASSESSMENT**

|                                                                                                                                                |                                                                                           |                                                                                                                                      |                                                                                                                                           |
|------------------------------------------------------------------------------------------------------------------------------------------------|-------------------------------------------------------------------------------------------|--------------------------------------------------------------------------------------------------------------------------------------|-------------------------------------------------------------------------------------------------------------------------------------------|
| <b>Ventricular function</b>                                                                                                                    |                                                                                           | <b>Pulmonary pressures</b>                                                                                                           |                                                                                                                                           |
| Wall Motion: <input type="radio"/> Normal <input type="radio"/> Global Hypokinesia<br><input type="radio"/> Regional wall motion abnormalities |                                                                                           | Tricuspid regurgitation                                                                                                              | TRPG (mmHg) :                                                                                                                             |
| LV systolic Function                                                                                                                           | LVID                                                                                      | Pulmonary regurgitation                                                                                                              | Peak PR (mmHg):                                                                                                                           |
|                                                                                                                                                | Diastole(mm)                                                                              | <b>Shunt lesion (Nature of shunt)</b><br><input type="radio"/> L→R <input type="radio"/> R→L<br><input type="radio"/> Bi directional | <b>Pericardial effusion (if present)</b><br><input type="radio"/> Mild<br><input type="radio"/> Moderate<br><input type="radio"/> Massive |
| Systole(mm)                                                                                                                                    | <b>Others</b><br><input type="checkbox"/> Vegetations <input type="checkbox"/> Thrombus   |                                                                                                                                      |                                                                                                                                           |
| EF%                                                                                                                                            |                                                                                           |                                                                                                                                      |                                                                                                                                           |
| LV diastolic function                                                                                                                          | E(cm/s)                                                                                   |                                                                                                                                      |                                                                                                                                           |
|                                                                                                                                                | A(cm/s)                                                                                   |                                                                                                                                      |                                                                                                                                           |
| RV systolic function                                                                                                                           | <input type="radio"/> Normal <input type="radio"/> Abnormal<br>TAPSE (mm) _____ Sa' _____ |                                                                                                                                      |                                                                                                                                           |

**Valve function (For aortic & pulmonary stenosis kindly fill form L and prosthetic valve fill form I)**

|           |                                 |                                                                                                                                       |                             |
|-----------|---------------------------------|---------------------------------------------------------------------------------------------------------------------------------------|-----------------------------|
| Mitral    | <input type="checkbox"/> Normal | <input type="checkbox"/> Stenotic <input type="radio"/> Mild <input type="radio"/> Moderate <input type="radio"/> Severe              | MVOA: _____ cm <sup>2</sup> |
|           |                                 | <input type="checkbox"/> Regurgitant <input type="radio"/> Mild <input type="radio"/> Moderate <input type="radio"/> Severe           | Mean Gradient:              |
|           |                                 |                                                                                                                                       | Peak gradient:              |
| Aortic    | <input type="checkbox"/> Normal | <input type="checkbox"/> Stenotic <sup>A</sup> <input type="radio"/> Mild <input type="radio"/> Moderate <input type="radio"/> Severe | Mean Gradient:              |
|           |                                 | <input type="checkbox"/> Regurgitant <input type="radio"/> Mild <input type="radio"/> Moderate <input type="radio"/> Severe           | Peak gradient :             |
| Tricuspid | <input type="checkbox"/> Normal | <input type="checkbox"/> Stenotic <input type="radio"/> Mild <input type="radio"/> Moderate <input type="radio"/> Severe              | Mean Gradient:              |
|           |                                 | <input type="checkbox"/> Regurgitant <input type="radio"/> Mild <input type="radio"/> Moderate <input type="radio"/> Severe           | Peak gradient:              |
| Pulmonary | <input type="checkbox"/> Normal | <input type="checkbox"/> Stenotic <sup>A</sup> <input type="radio"/> Mild <input type="radio"/> Moderate <input type="radio"/> Severe | Mean Gradient:              |
|           |                                 | <input type="checkbox"/> Regurgitant <input type="radio"/> Mild <input type="radio"/> Moderate <input type="radio"/> Severe           | Peak gradient:              |

**M4** TNPHDR Risk category (as per triage):  LOW RISK  HIGH RISK

On Medications:

**M5** Hospitalisations after discharge:  Yes  No. If Yes, Reason \_\_\_\_\_

**M6** Post-partum plan

**M7 NEONATAL OUTCOME**

**M7.1** Neonatal weight gain:

**M7.2** Echocardiographic evaluation (if any)

**M7.3** Adverse neonatal outcome:  Neonatal death  Cardiac lesion  Malnourishment

**M8** Date of next follow up:

|   |   |   |   |   |   |   |   |
|---|---|---|---|---|---|---|---|
| D | D | M | M | Y | Y | Y | Y |
|---|---|---|---|---|---|---|---|

**FOLLOW UP VISIT-II**

Date

|   |   |   |   |   |   |   |   |
|---|---|---|---|---|---|---|---|
| D | D | M | M | Y | Y | Y | Y |
|---|---|---|---|---|---|---|---|

**N1 PATIENT SYMPTOMS**

**N1.1 NYHA CLASS**    Class I                       Class II                       Class III                       Class IV

Presenting symptoms (tick all applicable)

|                          |                          |                          |                          |                            |                            |                           |                          |
|--------------------------|--------------------------|--------------------------|--------------------------|----------------------------|----------------------------|---------------------------|--------------------------|
| <b>N1.2</b><br>Nil       | <b>N1.3</b><br>Dyspnea   | <b>N1.4</b><br>PND       | <b>N1.5</b><br>Orthopnea | <b>N1.6</b><br>Palpitation | <b>N1.7</b><br>Pedal edema | <b>N1.8</b><br>Chest pain | <b>N1.9</b><br>Syncope   |
| <input type="checkbox"/> | <input type="checkbox"/> | <input type="checkbox"/> | <input type="checkbox"/> | <input type="checkbox"/>   | <input type="checkbox"/>   | <input type="checkbox"/>  | <input type="checkbox"/> |

**N1.10**  Others (Specify):

**N2 CLINICAL SIGNS & ECG**

|                       |                       |                       |
|-----------------------|-----------------------|-----------------------|
| <b>N2.1</b> Ht (cm)   | <b>N2.2</b> Wt (Kg)   | <b>N2.3</b> RR (/min) |
| <b>N2.4</b> HR (/min) | <b>N2.5</b> BP(mm Hg) | <b>N2.6</b> SPO2 (%)  |

**N2.7** CVS: S1 \_\_\_\_\_ S2 \_\_\_\_\_

Murmur:  Yes  No       Sys       Dias       Normal

Gallop:  Yes  No       LVS3       RVS3       Elevated

**N2.8** JVP      **N2.9** RS    Normal    Abnormal

Crepitations

Rhonchi/ Wheeze

**N2.10** ECG    Normal    Abnormal. If abnormal, Choose:

AF    SVT    VT    1°AVB    2 AVB    CHB    ST↑    ST↓    Others

**Others, Specify:**

**N3 ECHOCARDIOGRAPHIC ASSESSMENT**

|                                                                                                                                                |                                                             |                                          |                                                                        |
|------------------------------------------------------------------------------------------------------------------------------------------------|-------------------------------------------------------------|------------------------------------------|------------------------------------------------------------------------|
| <b>Ventricular function</b>                                                                                                                    |                                                             | <b>Pulmonary pressures</b>               |                                                                        |
| Wall Motion: <input type="radio"/> Normal <input type="radio"/> Global Hypokinesia<br><input type="radio"/> Regional wall motion abnormalities |                                                             | Tricuspid regurgitation                  | TRPG (mmHg) :                                                          |
| LV systolic function                                                                                                                           | LVID                                                        | Pulmonary regurgitation                  | Peak PR (mmHg):                                                        |
|                                                                                                                                                | Diastole(mm)                                                | <b>Shunt lesion (Nature of shunt)</b>    | <input type="radio"/> L→R <input type="radio"/> R→L                    |
| Systole(mm)                                                                                                                                    | <input type="radio"/> Bi directional                        |                                          |                                                                        |
|                                                                                                                                                | EF%                                                         | <b>Pericardial effusion (if present)</b> | <input type="radio"/> Mild                                             |
| LV diastolic function                                                                                                                          | E(cm/s)                                                     |                                          | <input type="radio"/> Moderate                                         |
|                                                                                                                                                | A(cm/s)                                                     |                                          | <input type="radio"/> Massive                                          |
| RV systolic function                                                                                                                           | <input type="radio"/> Normal <input type="radio"/> Abnormal | <b>Others</b>                            | <input type="checkbox"/> Vegetations <input type="checkbox"/> Thrombus |
|                                                                                                                                                | TAPSE (mm) _____ Sa' _____                                  |                                          |                                                                        |

**Valve function (For aortic & pulmonary stenosis kindly fill form L and prosthetic valve fill form I)**

|           |                                 |                                                                                                                                       |                             |
|-----------|---------------------------------|---------------------------------------------------------------------------------------------------------------------------------------|-----------------------------|
| Mitral    | <input type="checkbox"/> Normal | <input type="checkbox"/> Stenotic <input type="radio"/> Mild <input type="radio"/> Moderate <input type="radio"/> Severe              | MVOA: _____ cm <sup>2</sup> |
|           |                                 | <input type="checkbox"/> Regurgitant <input type="radio"/> Mild <input type="radio"/> Moderate <input type="radio"/> Severe           | Mean Gradient:              |
|           |                                 |                                                                                                                                       | Peak gradient:              |
| Aortic    | <input type="checkbox"/> Normal | <input type="checkbox"/> Stenotic <sup>Δ</sup> <input type="radio"/> Mild <input type="radio"/> Moderate <input type="radio"/> Severe | Mean Gradient:              |
|           |                                 | <input type="checkbox"/> Regurgitant <input type="radio"/> Mild <input type="radio"/> Moderate <input type="radio"/> Severe           | Peak gradient :             |
| Tricuspid | <input type="checkbox"/> Normal | <input type="checkbox"/> Stenotic <input type="radio"/> Mild <input type="radio"/> Moderate <input type="radio"/> Severe              | Mean Gradient:              |
|           |                                 | <input type="checkbox"/> Regurgitant <input type="radio"/> Mild <input type="radio"/> Moderate <input type="radio"/> Severe           | Peak gradient:              |
| Pulmonary | <input type="checkbox"/> Normal | <input type="checkbox"/> Stenotic <sup>Δ</sup> <input type="radio"/> Mild <input type="radio"/> Moderate <input type="radio"/> Severe | Mean Gradient:              |
|           |                                 | <input type="checkbox"/> Regurgitant <input type="radio"/> Mild <input type="radio"/> Moderate <input type="radio"/> Severe           | Peak gradient:              |

**N4** TNPHDR Risk category (as per triage):    LOW RISK                       HIGH RISK

On Medications:

**N5** Hospitalisations after discharge:  Yes  No. If Yes, Reason \_\_\_\_\_

**N6** Post-partum plan:

**N7 NEONATAL OUTCOME**

**N7.1** Neonatal weight gain

**N7.2** Echocardiographic evaluation (if any)

**N7.3** Adverse neonatal outcome:    Neonatal death                       Cardiac lesion                       Malnourishment

**N8** Date of next follow up:

|   |   |   |   |   |   |   |   |
|---|---|---|---|---|---|---|---|
| D | D | M | M | Y | Y | Y | Y |
|---|---|---|---|---|---|---|---|

**FOLLOW UP VISIT -III**

Date

|   |   |   |   |   |   |   |   |
|---|---|---|---|---|---|---|---|
| D | D | M | M | Y | Y | Y | Y |
|---|---|---|---|---|---|---|---|

**O1 PATIENT SYMPTOMS**

**O1.1 NYHA CLASS**  Class I  Class II  Class III  Class IV

Presenting symptoms (tick all applicable)

|                          |                          |                          |                          |                            |                            |                           |                          |
|--------------------------|--------------------------|--------------------------|--------------------------|----------------------------|----------------------------|---------------------------|--------------------------|
| <b>O1.2</b><br>Nil       | <b>O1.3</b><br>Dyspnea   | <b>O1.4</b><br>PND       | <b>O1.5</b><br>Orthopnea | <b>O1.6</b><br>Palpitation | <b>O1.7</b><br>Pedal edema | <b>O1.8</b><br>Chest pain | <b>O1.9</b><br>Syncope   |
| <input type="checkbox"/> | <input type="checkbox"/> | <input type="checkbox"/> | <input type="checkbox"/> | <input type="checkbox"/>   | <input type="checkbox"/>   | <input type="checkbox"/>  | <input type="checkbox"/> |

**O1.10**  Others (Specify):

**O2 CLINICAL SIGNS & ECG**

|                       |                       |                       |
|-----------------------|-----------------------|-----------------------|
| <b>O2.1</b> Ht (cm)   | <b>O2.2</b> Wt (Kg)   | <b>O2.3</b> RR (/min) |
| <b>O2.4</b> HR (/min) | <b>O2.5</b> BP(mm Hg) | <b>O2.6</b> SPO2 (%)  |

**O2.7** CVS: S1 \_\_\_\_\_ S2 \_\_\_\_\_  
 Murmur:  Yes  No  Sys  Dias  Normal  
 Gallop:  Yes  No  LVS3  RVS3  Elevated

**O2.8** JVP  Normal  Elevated

**O2.9** RS  Normal  Abnormal  
 Crepitations  Rhonchi/ Wheeze

**O2.10** ECG  Normal  Abnormal. If abnormal, Choose:  
 AF  SVT  VT  1°AVB  2° AVB  CHB  ST↑  ST↓  Others  
 Others, Specify:

**O3 ECHOCARDIOGRAPHIC ASSESSMENT**

|                                                                                                                                             |                                                                            |                                          |                                                                                          |
|---------------------------------------------------------------------------------------------------------------------------------------------|----------------------------------------------------------------------------|------------------------------------------|------------------------------------------------------------------------------------------|
| <b>Ventricular function</b>                                                                                                                 |                                                                            | <b>Pulmonary pressures</b>               |                                                                                          |
| Wall Motion: <input type="radio"/> Normal <input type="radio"/> Global Hypokinesia <input type="radio"/> Regional wall motion abnormalities |                                                                            | Tricuspid regurgitation                  | TRPG (mmHg):                                                                             |
| LV systolic function                                                                                                                        | LVID Diastole(mm) Systole(mm) EF%                                          | Pulmonary regurgitation                  | Peak PR (mmHg):                                                                          |
| LV diastolic function                                                                                                                       | E(cm/s) A(cm/s)                                                            | <b>Shunt lesion (Nature of shunt)</b>    | <input type="radio"/> L→R <input type="radio"/> R→L <input type="radio"/> Bi directional |
| RV systolic function                                                                                                                        | <input type="radio"/> Normal <input type="radio"/> Abnormal TAPSE (mm) Sa' | <b>Pericardial effusion (if present)</b> | <input type="radio"/> Mild <input type="radio"/> Moderate <input type="radio"/> Massive  |
|                                                                                                                                             |                                                                            | <b>Others</b>                            | <input type="checkbox"/> Vegetations <input type="checkbox"/> Thrombus                   |

**Valve function (For aortic & pulmonary stenosis kindly fill form L and prosthetic valve fill form I)**

|           |                                                                                                                                                                                                                                                                                                   |                                              |
|-----------|---------------------------------------------------------------------------------------------------------------------------------------------------------------------------------------------------------------------------------------------------------------------------------------------------|----------------------------------------------|
| Mitral    | <input type="checkbox"/> Normal <input type="checkbox"/> Stenotic <input type="radio"/> Mild <input type="radio"/> Moderate <input type="radio"/> Severe <input type="checkbox"/> Regurgitant <input type="radio"/> Mild <input type="radio"/> Moderate <input type="radio"/> Severe              | MVOA: _____ cm <sup>2</sup>                  |
| Aortic    | <input type="checkbox"/> Normal <input type="checkbox"/> Stenotic <sup>A</sup> <input type="radio"/> Mild <input type="radio"/> Moderate <input type="radio"/> Severe <input type="checkbox"/> Regurgitant <input type="radio"/> Mild <input type="radio"/> Moderate <input type="radio"/> Severe | Mean Gradient: _____<br>Peak gradient: _____ |
| Tricuspid | <input type="checkbox"/> Normal <input type="checkbox"/> Stenotic <input type="radio"/> Mild <input type="radio"/> Moderate <input type="radio"/> Severe <input type="checkbox"/> Regurgitant <input type="radio"/> Mild <input type="radio"/> Moderate <input type="radio"/> Severe              | Mean Gradient: _____<br>Peak gradient: _____ |
| Pulmonary | <input type="checkbox"/> Normal <input type="checkbox"/> Stenotic <sup>A</sup> <input type="radio"/> Mild <input type="radio"/> Moderate <input type="radio"/> Severe <input type="checkbox"/> Regurgitant <input type="radio"/> Mild <input type="radio"/> Moderate <input type="radio"/> Severe | Mean Gradient: _____<br>Peak gradient: _____ |

**O4** TNPHDR Risk category (as per triage):  LOW RISK  HIGH RISK

On Medications:

**O5** Hospitalisations after discharge:  Yes  No. If Yes, Reason \_\_\_\_\_

**O6** Post-partum plan

**O7** Date of next follow up:

|   |   |   |   |   |   |   |   |
|---|---|---|---|---|---|---|---|
| D | D | M | M | Y | Y | Y | Y |
|---|---|---|---|---|---|---|---|
